1 **Bactericidal efficiency and mechanism of specifically targeted antimicrobial**  
2 **peptides optimized based on structural and functional relationships**

3 Peng Tan<sup>a,#</sup>, Zhenheng Lai<sup>a,#</sup>, Yongjie Zhu<sup>a</sup>, Changxuan Shao<sup>a</sup>, Muhammad Usman Akhtar<sup>a</sup>, Weifen Li<sup>b</sup>,  
4 Xin Zheng<sup>c</sup>, Anshan Shan<sup>a,\*</sup>

5 <sup>a</sup>Laboratory of Molecular Nutrition and Immunity. The Institute of Animal Nutrition, Northeast Agricultural  
6 University, Harbin, China

7 <sup>b</sup>Institute of Animal Nutrition and Feed Science, College of Animal Science, Zhejiang University,  
8 Hangzhou, China

9 <sup>c</sup>College of Animal Science and Technology, Jilin Agricultural University, Changchun, China

10 Author information

11 \*Corresponding author: Anshan Shan

12 #These authors contributed equally to this work

13 Telephone: +86 451 55190685

14 Fax: +86 451 55103336

15 E-mail: [asshan@neau.edu.cn](mailto:asshan@neau.edu.cn)

16 Postal address: No. 600 Changjiang Road, Xiangfang District, Harbin, China

17

18 **Keywords:** specifically targeted antibacterial peptides, activity, specificity, antibacterial mechanism

19 **Abstract**

20 In contrast to traditional broad-spectrum antibiotics, it is difficult for bacteria to develop resistance to  
21 most specifically targeted antimicrobial peptides (STAMPs), moreover, they can maintain a normal  
22 ecological balance and provide long-term protection for the body. However, therapeutic applications of  
23 STAMPs are hindered by their weak activity, and imperfect specificity as well as lack of knowledge to  
24 understand their structure-activity relationships. To further investigate the effects of different parameters  
25 on the biological activities of STAMPs, a peptide sequence, WKKIWK<sup>D</sup>PGIKKWIK, was truncated,  
26 extended, and provided with an increased charge and altered amphipathicity. In addition, a novel  
27 template modification method was introduced, in which a phage-displayed peptide that recognized and  
28 bound to *E. coli* cells was attached at the end of the sequence. Compared with the traditional template  
29 modification method, peptide 11, which contained a phage-displayed peptide at the C-terminus,  
30 exhibited superior narrow-spectrum antibacterial activity against *E. coli* compared to that of parental  
31 peptide 2, and the activity and specificity of 11 were increased by 5.0 and 2.4 times, respectively.  
32 Additionally, 11 showed low cell toxicity and relatively desirable salt, serum, acid and alkaline stability. In  
33 this study, 11 specifically killed *E. coli* by causing cytoplasmic membrane rupture and cytosol leakage. In  
34 summary, these findings are useful for improving the activity and specificity of STAMPs and show that  
35 peptide 11 is better able to combat the growing threat of *E. coli* infections.

36

## 37 Introduction

38 With the development of bacterial resistance, antibiotics to combat microbes are becoming limited.  
39 Moreover, antibiotics are used to kill bacteria and result in the release of large amounts of  
40 lipopolysaccharide (LPS), which is the major component of the outer membrane of Gram-negative  
41 bacteria and induces serious complications, such as septic shock and severe sepsis[1]. For that reason,  
42 there is a urge need for development of novel antimicrobial agents. Antimicrobial peptides (AMPs) are a  
43 new class of antimicrobial agent that has the potential to substitute for traditional antibiotics.

44 Antimicrobial peptides (AMPs), which are part of the immune system, form the first line of defense  
45 against pathogenic bacteria[2]. Compared with traditional antibiotics, AMPs possess a unique  
46 mechanism, and it is widely accepted that the cytoplasmic membrane is the main target of AMPs[3].  
47 Because of this mechanism, bacteria have low potential to develop resistance to AMPs. However, AMPs  
48 have similar activity profile to conventional antibiotics, showing broad-spectrum antimicrobial activities  
49 against both Gram-negative and Gram-positive bacteria; these agents kill or inhibit benign and  
50 pathogenic organisms indiscriminately, thus disrupting the homeostasis between a healthy microbiota  
51 and the immune system[4, 5]. Consequently, there is an urgent need for novel antimicrobial peptides that  
52 are capable of targeting specific pathogens without harming the normal flora. Specifically targeted  
53 antimicrobial peptides (STAMPs) can maintain the ecological balance of normal microbial  
54 communities[6]. Although researchers are now working on the development of targeted antibacterial  
55 agents, some problems persist, such as the weak activity and poor specificity of STAMPs. At present,  
56 the strategies used to improve the activity of broad-spectrum antimicrobial peptides are systematic  
57 sequence extension or truncation, amino acid substitution, and increases in charge and  
58 amphipathicity[7], but how to improve the activity and specificity of STAMPs has been rarely reported to  
59 date.

60 Recently, we discovered the antimicrobial peptide KI[8]. After removing the chemical modification at  
61 both ends, we found that it only had weak antibacterial activity against *Escherichia coli* (*E. coli*). As is  
62 known, *E. coli* is the predominant facultative flora of the human and animal intestine. Pathogenic *E. coli*  
63 not only can cause bacterial diarrhea in animals but can also lead to human urinary tract infections,  
64 meningitis, and pneumonia and even affect the human nervous system[9, 10]. To further improve the  
65 activity and specificity of peptide 2 for *E. coli* and to study the relationship between the structure and  
66 activity of STAMPs, we modified peptide 2 using traditional template modification methods, including  
67 altering its length, amphipathicity and charge[11, 12]. In addition, we used a novel modification method  
68 to link a phage-displayed peptide to the ends of the peptide 2. Filamentous bacteriophages can display  
69 foreign peptides expressed by DNA sequences introduced in the genome through recombinant  
70 modification on their surface, which are able to recognize and bind specific targets, such as the whole *E.*  
71 *coli* cell or some kinds of cell surface receptors[13, 14]. In this study, we used phage displayed-peptide  
72 14 screened from a phage display random peptide library, which targets *E. coli* cell and specifically binds  
73 to the surface of these cells.

74 The secondary structures of these peptides were determined in different solutions (PBS, SDS, and  
75 TFE). The antimicrobial activities of the peptides were then measured, and we introduced a novel index,  
76 the targeted antimicrobial index (TI), which can reflect the specificity of STAMP for a kind of bacteria.  
77 Moreover, the salt, serum acid and alkaline sensitivities; hemolytic activity; and cytotoxicity were also  
78 evaluated. Finally, to study the antibacterial mechanism of STAMP, LPS and LTA binding, outer  
79 membrane permeability, inner membrane permeability, cytoplasmic membrane depolarization, scanning  
80 electron microscopy (SEM), transmission electron microscopy (TEM), super-resolution microscopy  
81 (SRM), flow cytometry were also employed. We found that linking a phage-displayed peptide to the C-  
82 and N-terminus could significantly improve the antimicrobial activity and specificity of STAMP.

83 Concurrently, we designed peptides 1-10 using different traditional sequence modification methods, but  
84 their effects were worse than our novel proposed method. These findings are helpful for the  
85 development of design strategies based on STAMPs.

## 86 Results

### 87 Peptide characterization

88 The designed peptides were synthesized by Sangon Biotech (Shanghai, China) and purified to  
89 greater than 95% purity using analytical reverse phase high-performance liquid chromatography  
90 (RP-HPLC). The molecular weights of peptides were determined by matrix-assisted laser  
91 desorption/ionization time-of-flight mass spectroscopy (MALDI-TOF MS). The measured molecular  
92 weights were close to the theoretical molecular weights, which indicated that the peptides were  
93 successfully synthesized.

94 The following design methods were adopted to modify the parental peptide 2. 1) Change the length  
95 of parental peptide 2. The ends of parental peptide 2 were truncated and extended, and each peptide  
96 was simultaneously decreased or increased by two amino acids at both ends. Among them, peptide 1  
97 was decreased by a total of 4 amino acids and peptides 3 and 4 were centered on the <sup>D</sup>PG Angle of  
98 peptide 2 and sequentially extended at the N- and C-terminus in the order of KWIK and IKKW,  
99 respectively. Peptides 3 and 4 were increased by a total of 4 and 8 amino acids, respectively. 2)  
100 Increase charge of the parental peptide 2. To peptides 5 and 6 were added one and two lysines at the  
101 end of the parental peptide, respectively. 3) Enhance the amphipathicity of parental peptide 2. As shown  
102 in Figure 1A, peptides 7 and 8 were designed by substituting amino acids at the 2nd or 13th position of  
103 parental peptide 2. Peptide 9 was designed by swapping the position of the 2nd and 13th amino acids of  
104 parent peptide 2. In peptide 10, the  $\beta$ -turn unit was removed to become a perfect amphipathic peptide. 4)  
105 Parental peptide 2, which connects the phage-displayed peptide at the N- or C-terminus, was used to  
106 enhance the specific identification and binding ability of STAMP to *E. coli*. Phage-displayed peptide 14,  
107 which was recruited from random peptide libraries, a whole-cell phage-display method was used to  
108 isolate peptide 14 specifically binding to the cell surface of *E. coli*[15]. Moreover, during the construction  
109 of the novel antimicrobial peptides with multi-domains, space hindrance often occurred because the  
110 different domains of the peptides were too close to each other, thus inhibiting the biological functions of  
111 the different peptide segments[6]. In the design of the peptide sequences, when the amino acid  
112 sequence was added to one end of the parental peptide, we introduced a short peptide sequence, GGG,  
113 composed of a flexible amino acid G as a linker[6]. The amino acid sequences of the peptides are listed  
114 in Table 1. The wheel-diagram, 3D structure projection, schematic structure and schematic model as

115 shown in Figure 1.

## 116 **CD spectra**

117 The secondary structures of the peptides were investigated by CD spectroscopy. SDS micelles  
118 were used to simulate the anionic microbial membrane environment, and TFE was used to mimic the  
119 hydrophobic environment[16]. As shown in Figure 2, the spectra of most peptides were not  
120 characteristic of the helix conformation in 10 mM PBS. By contrast, in 50% TFE, all peptides other than  
121 14 tended to form an  $\alpha$ -helical structure with two negative peaks at approximately 208 and 222 nm. In  
122 the SDS environment, the  $[\theta]_{220}$  values of peptide 1 (-728), 2 (-839), 3 (-1668) and 4 (-6924) showed  
123 that when  $^D$ PG was in the middle of the peptide sequence, the weaker helical structure of the peptide  
124 was destroyed by  $^D$ PG with the extension of the peptide sequence. Peptide 5 and 6 also showed helical  
125 properties in SDS environments. The amphiphilicity of peptide 7, 8 and 9 was improved; however, the  
126 helical propensity changes were not obvious. When  $^D$ PG was removed, peptide 10 was converted into a  
127 typical  $\alpha$ -helical structure. Phage-displayed peptide 14 had a minimum at  $\approx$  200 nm and a value near  
128 zero at 220 nm, supporting a disordered structure, and 11 and 12 exhibited two negative dichroic bands  
129 at approximately 208 and 222 nm, indicating the predominance of  $\alpha$ -helical structures, similar to the  
130 results obtained for parental peptide 2.

## 131 **Antibacterial activity and specificity of peptides**

132 Antibacterial activity of peptides is summarized in Table 2. To better evaluate the antimicrobial  
133 activity and specificity of peptides against *E. coli*, the geometric means (GMs) of the MICs of the  
134 peptides against the tested pathogenic or beneficial strains were calculated and are presented in Table  
135 3. In the design of truncated and extended STAMP chains, stronger anti-*E. coli* activity was achieved  
136 with a longer length of the peptide (peptide 1 < 2 < 3 < 4). The increased charge of peptides 5 and 6 did  
137 not show a significant enhancement of antimicrobial activity against *E. coli* compared with parental  
138 peptide 2 (peptide 2  $\approx$  5  $\approx$  6). In the design of the amphipathicity modification, the activity of the peptide  
139 against *E. coli* showed a decreasing trend. However, when STAMP was replaced with perfect  
140 amphipathic peptide 10, the activity of peptide 10 toward *E. coli* increased (peptide 7  $\approx$  8  $\approx$  9 < 2 < 10).  
141 When the phage-displayed peptide was linked to the end of the parental peptide, the activities of  
142 peptides 11 and 12 to *E. coli* were enhanced; 11 had better antimicrobial activity against *E. coli* (peptide  
143 2 < 12 < 11). Among all peptides, 4 and 10 displayed broad-spectrum anti-bacterial activity; in addition,  
144 the other peptides showed narrow-spectrum antimicrobial activity against *E. coli*. In the MIC test for

145 beneficial bacteria, melittin possessed broad-spectrum antimicrobial activity, and no other peptides  
146 except peptide 4 had any effect. Moreover, the ratio of GM (*E. coli*) to GM (other pathogenic strains) and  
147 GM (*E. coli*) to GM (beneficial strains) was used to as the targeting index (TI); smaller targeting index  
148 values indicated greater specific antimicrobial ability toward *E. coli*. Peptide 11 had the lowest  $TI_{all}$  value  
149 (0.028), which was 31 times lower than that of melittin ( $TI_{all}=0.876$ ). Compared with parental peptide 2  
150 ( $TI_{all}=0.067$ ), the specificity of 11 for *E. coli* increased by 2.4 times; the specificities of 3 ( $TI_{all}=0.040$ ) and  
151 12 ( $TI_{all}=0.035$ ) were also enhanced.

## 152 **Hemolytic activity and cytotoxicity**

153 Table 3 and Figure 3 summarize the peptide hemolytic activities. The results showed that  
154 hemolysis of all peptides except 4 was less than 5% at all concentrations. Compared to melittin, all  
155 peptides had significantly lower hemolytic activity ( $P<0.05$ ). The ratio of MHC to GM served as the  
156 selectivity index (SI), which indicated the cell selectivity of a peptide. Peptide 11 was found to have a  
157 relatively high SI of 80.630, and although peptide 3 had a higher selectivity index than peptide 11, its TI  
158 was only 0.040. In the cytotoxicity test of human embryonic kidney cells (HEK293T) and intestinal  
159 porcine enterocyte cells (IPEC-J2) (Figure 4), the toxicity of extended peptide 4 and perfect amphipathic  
160 peptide 10 was significant; peptide 4 killed approximately 99% of HEK293t and IPEC-J2 at 128  $\mu$ M,  
161 followed by peptide 10, which killed approximately 99% of HEK293t and 63% IPEC-J2. In contrast, 11  
162 exhibited very high selectivity for two kinds of cells, and compared with 2, the toxicity was increased  
163 minimally at 128  $\mu$ M.

## 164 **Salt, Serum, Acid and Alkali sensitivity**

165 Peptides must maintain activity in a physiological environment for clinical applications. However,  
166 many peptides have low stability *in vivo* and are susceptible to salt, serum, acid and alkaline conditions.  
167 Thus, the antimicrobial activities of the peptides were tested following the addition of concentrations of  
168 different salts, serum, acid and alkaline agents using a sensitivity assay (Table 4). The results revealed  
169 that in the presence of 150 mM NaCl and 1 mM  $MgCl_2$ , these peptides (other than 4) significantly  
170 reduced the potency against *E. coli* 25922. Parental 2 almost lost all antibacterial activity toward *E. coli*.  
171 Nonetheless, peptide 11, which we selected as a target sequence, was not completely deprived of  
172 activity, maintaining a relatively desirable active state. The MIC values for *E. coli* were 32  $\mu$ M and 16  $\mu$ M.  
173 Overall, 2 showed greater susceptibility compared with 11.

174 In the presence of  $NH_4Cl$ , KCl,  $ZnCl_2$  and  $FeCl_3$  displayed relatively minimally repressive effects on



175 the anti-bacterial activities of the peptides. In serum, acid and alkaline sensitivity tests, the MIC values  
176 of the peptides were not significantly increased.

### 177 **LPS, LTA binding assays**

178 Lipopolysaccharide (LPS) and lipoteichoic acid (LTA) are negative electrochemical components of  
179 Gram-negative and Gram-positive bacteria, respectively, which can interact with positively charged  
180 AMPs. As shown in Figure 5A and Figure 5B, the binding activity of 11 to LPS and LTA presented a  
181 dose-dependent increase, the binding capacity of which was stronger than that of 2 and comparable to  
182 that of melittin. Figure 5A and Figure 5B show a stronger fluorescence intensity for the binding activity of  
183 11 with 50% *E. coli* at a low peptide concentration (2  $\mu$ M) than that of melittin (21%) and parental 2 (6%),  
184 and the binding capacity of 11 to *E. coli* LPS at 2  $\mu$ M was stronger than that of *P. aeruginosa* LPS (16%)  
185 and *S. aureus* LTA (23%).

### 186 **Outer and inner membrane permeability**

187 The potential of the peptides to permeabilize bacterial outer membranes was studied using  
188 *N*-phenyl-1-naphthylamine (NPN) uptake assays[17]. The outer membrane is a unique component of  
189 Gram-negative bacteria, which can provide an extra layer of protection to the organism. When the outer  
190 membrane is damaged or disrupted, NPN binds to the phospholipid layer and provide fluorescence. As  
191 shown in Figure 5C, a dose-dependent response of peptides in permeabilizing the outer membrane of  
192 Gram-negative bacteria (*E. coli* and *P. aeruginosa*) was observed. In the presence of 2  $\mu$ M peptide 11,  
193 the permeability of the outer membrane was stronger than that of parental 2 and melittin, reaching 61%  
194 and 27%, respectively, for *E. coli* and *P. aeruginosa*.

195 The inner membrane permeability was assessed by *o*-nitrophenol- $\beta$ -D-galactoside (ONPG) assays,  
196 which were used to detect the enterobacter in delayed lactose fermentation (containing *Escherichia*,  
197 *Klebsiella*, etc.)[18]. When the inner membrane of *E. coli* is damaged, ONPG enters the cytoplasm,  
198 where it can be hydrolyzed into galactose and yellow *o*-nitrophenol (ONP) by beta-galactosidase.  
199 Therefore, inner membrane permeabilization can be measured by color changes in the culture medium.  
200 As shown in Figure 5D, peptides 2 and 11 and melittin induced increases in the permeability of the inner  
201 membrane from 0 to 4000 seconds at 2  $\mu$ M. The optical density of 11 was significantly higher than that  
202 of 2 and similar to that of melittin, indicating that the inner membrane permeability of 11 was obviously  
203 stronger than that of parental 2. This phenomenon was largely consistent with the results of the outer  
204 membrane permeability test.

## 205 **Cytoplasmic membrane depolarization**

206 The ability of 2, 11 and melittin to depolarize the membranes of intact *E. coli*, *P. aeruginosa* and *S.*  
207 *aureus* cells was determined using the membrane potential-sensitive dye diSC<sub>3-5</sub>, which can become  
208 concentrated in the cytoplasmic membrane based on the membrane potential, leading to the  
209 self-quenching of fluorescence[19]. When the membrane potential is disrupted, the dye dissociates into  
210 the buffer, causing an increase in fluorescence intensity. As shown in Figure 5E, in the cytoplasmic  
211 membrane test of *E. coli*, the depolarization ability of 11 was enhanced compared with that of parental 2.  
212 By contrast, 2 and 11 showed slight depolarization of the cytoplasmic membrane of *P. aeruginosa*  
213 compared with melittin, potentially causing a small number of strains to rupture. For *S. aureus*, no  
214 cytoplasmic membrane depolarization occurred within 800 seconds, suggesting that 2 and 11 were not  
215 effective against membranes of *S. aureus*. We consider the above results to explain the  
216 narrow-spectrum antibacterial activity of the peptides against *E. coli*.

## 217 **SEM and TEM characterization**

218 To further elucidate the narrow-spectrum antimicrobial mechanisms of 11, SEM and TEM were  
219 implemented to study *E. coli*, *P. aeruginosa* and *S. aureus* morphological alterations, and parental 2 and  
220 melittin were added for comparison. To evaluate the therapeutic effect of the peptides, we used the  
221 same concentration of 2  $\mu$ M. In the absence of peptide treatment, the bacterial cells had brilliant and  
222 smooth membrane surfaces (Figure 6). However, one hour after treatment with 11, membrane creping  
223 and destruction were observed in *E. coli* cells; however, this phenomenon was not observed in most *P.*  
224 *aeruginosa* and *S. aureus* and cells. In contrast to 11, parental 2 did not achieve an antibacterial effect  
225 due to an insufficient concentration, and the *E. coli* cells were barely damaged. Melittin showed a  
226 broad-spectrum antibacterial effect at this concentration, with significant membrane stunting and  
227 corrugation on the surface of *E. coli*, *P. aeruginosa* and *S. aureus*.

228 TEM revealed the morphological and intracellular changes in *E. coli*, *P. aeruginosa* and *S. aureus*  
229 cells after treatment with 2, 11 and melittin. Similarly, under TEM, after 60 min of treatment, 11 caused  
230 substantial damage to *E. coli* membranes and outflow of the cytoplasm (Figure 7).

## 231 **Super-resolution microscopy (SRM)**

232 The localization of FITC-labeled peptide 11 was studied by super-resolution microscopy. As shown  
233 in Figure 8, FITC-labeled peptide 11 was represented by green fluorescent signals on the surface and  
234 inside of *E. coli* cells, while *E. coli* nucleic acid was stained with PI dye and observed as a red

235 fluorescent signal. The results distinctly indicated that 11 targeted the *E. coli* membrane surface and  
236 compromised membrane integrity.

### 237 **Flow cytometry**

238 The DNA intercalating dye propidium iodide (PI) was used as an indicator to investigate *E. coli*, *P.*  
239 *aeruginosa* and *S. aureus* cell death by flow cytometry (Figure 9). In the absence of peptide, the  
240 percentage of *E. coli* 25922, *P. aeruginosa* 27853 and *S. aureus* 29213 cells with PI fluorescent signal  
241 was 2.3%, 5.0%, and 5.2%, respectively. Treatment with 2  $\mu$ M peptides showed that peptide 2 resulted  
242 in 57.7% (*E. coli*), 31.3% (*P. aeruginosa*), and 14.9% (*S. aureus*) cell staining; peptide 11 resulted in  
243 96.2% (*E. coli*), 33.0% (*P. aeruginosa*), and 11.0% (*S. aureus*) cell staining; and melittin resulted in the  
244 staining of greater than 90% staining of all three bacteria. These results indicated that peptide 11 had  
245 narrow-spectrum antibacterial activity against *E. coli* and induced more potent damage to *E. coli* than  
246 the parental peptide.

## 247 Discussion

248 With the increase in antibiotic-resistant bacteria worldwide, the demand for novel antimicrobial  
249 drugs to fight against infectious diseases is also increasing[20]. STAMPs represent a novel class of  
250 therapeutic drugs that can be used to treat microbial infections without disrupting homeostasis. However,  
251 there are many obstacles in the development of STAMPs that must be circumvented, including  
252 optimization of STAMP specificity and activity. Template modification is performed using a naturally  
253 occurring or designed AMP sequence as a starting template, followed by systematic sequence  
254 extension or truncation, a charge increase, amino acid substitutions, and amphipathicity changes to  
255 improve antimicrobial activities[7]. Previous researchers have commonly changed one or two key  
256 parameters to transform peptides, resulting in few optimal sequences for therapeutic applications due to  
257 weak activity; susceptibility to salt; serum, acid, and alkaline inactivation; and high cytotoxicity. In this  
258 study, all the above factors were used in an attempt to improve the activity and specificity of STAMP,  
259 and we focused on the effects of different design parameters on the antimicrobial spectrum and  
260 biological activity of peptides.

261 The stable secondary structure of AMPs in the membrane environment is very important for their  
262 biological activity[21]. Our results showed that most of the AMPs with disordered conformations in PBS  
263 displayed a conversion to an  $\alpha$ -helical conformation in TFE and SDS (Figure 2). The helical propensity  
264 of AMPs is typically affected by the composition of hydrophobic amino acids. Phage-displayed peptide  
265 14 contained only three hydrophobic amino acids as well as proline, and proline residues can damage  
266 the  $\alpha$ -helical propensity. Thus, peptide 14 tended to form a disordered structure in membrane-like  
267 environments. Similarly, D-Pro-Gly had a rigid bend that also disrupted the  $\alpha$ -helical propensity;  
268 therefore, except peptide 10, these peptides had a weak  $\alpha$ -helical secondary structure signal in a  
269 membrane-like environment. In comparison, peptide 10 and melittin had the typical  $\alpha$ -helical  
270 conformation.

271 As is known, the length of the sequence affects the activity of AMPs[22, 23]. We designed peptide 1  
272 by removing two amino acids at both the N- and C-termini of parental peptide 2 without changing the  
273 amino acid composition, which resulted in a loss of biological activity. This phenomenon suggested that  
274 shortening the length of peptide 2 could not achieve the desired effect and that reducing four or more  
275 residue(s) led to a gradual loss of biological activity. Moreover, peptide 1 had a reduced helical tendency  
276 in SDS (Figure 2), suggesting that STAMPs require at least 14 amino acids to maintain helical a

277 structure able to span the membrane lipid bilayer. To further determine the optimal length of the peptide  
278 for exerting narrow-spectrum antibacterial activity against *E. coli*, peptide 2 was extended, and the  
279 designed peptides 3 and 4 showed increased activity against *E. coli*. Interestingly, peptide 4, which  
280 contained 22 amino acids, exhibited broad-spectrum antibacterial activity, and the results showed that  
281 STAMP could be converted into a broad-spectrum antimicrobial peptide after extending the sequences.  
282 Although the activity of peptide 3 and 4 was enhanced in comparison to those of parental peptide 2, the  
283 increase in sequence length also increased the toxicity of AMPs[24]. This phenomenon is consistent  
284 with previous studies and might provide an explanation for the excess hydrophobicity of the longer  
285 peptide molecule to obstruct the interaction between the peptide and zwitterionic phospholipids while  
286 leading to a loss of cell selectivity[25, 26]. Therefore, in this study, we did not enhance the specificity  
287 and activity of STAMPs by extending the sequence because this design approach conflicts with the low  
288 cytotoxicity (Figures 3 and 4).

289 The bacterial membrane contains anionic components, such as lipopolysaccharides,  
290 mannoproteins, or anionic phospholipids, which can interact with AMP molecules via electrostatic  
291 interactions[27]. AMPs aggregate on the membrane surface when they accumulate at a critical  
292 concentration, followed by membrane lipid bilayer insertion, resulting in the destruction of the  
293 membrane, leakage of the cytoplasm and cell death[28, 29]. Therefore, we speculate that increasing the  
294 charge number of STAMPs can enhance the electrostatic interactions between the molecule and the  
295 membrane to improve the antimicrobial activity and specificity. Arginine and lysine act as cationic  
296 residues that can produce strong antibacterial activity under physiological conditions, while the use of  
297 arginine residues is frequently associated with relatively higher hemolytic activities[30, 31]. To avoid  
298 increased toxicity, we added one or two lysine residues to the C-terminus of parental peptide 2 and  
299 designed peptides 5 and 6. Unfortunately, the activities of peptides 5 and 6 toward *E. coli* were not  
300 enhanced compared with that of peptide 2 (Table 2 and Table 3). Therefore, these findings indicate that  
301 STAMPs are the same as broad-spectrum antimicrobial peptides, and the relationship between the  
302 charge and biological activity is not linear, as increases of positive charges above a threshold (usually  
303 5-6) did not result in increased antimicrobial activity[26, 32].

304 Amphipathicity is another important parameter that can affect the antimicrobial activity of  $\alpha$ -helical  
305 AMPs[33]. The research of Khara, J. S showed that a perfect amphipathic of an  $\alpha$ -helical AMP can  
306 effectively enhance the antibacterial potential, but perfect amphipathicity often leads to a simultaneous

307 increase in activity and cytotoxicity[34]. Thus, a balance of amphipathicity is required to achieve the  
308 satisfactory biological activity. In our search, peptides 7, 8, 9 and 10 contained amino acid replacements  
309 to increase amphipathicity, but the results showed that the antibacterial activity of peptides 7, 8, and 9  
310 against *E. coli* was weaker than that of parental peptide 2. In 30 mM SDS, the helical structures of  
311 peptides 7, 8, and 9 were not significantly affected by the enhanced amphipathicity (Figure 2); therefore,  
312 the activity of the peptides was not improved. Simultaneously, perfect amphipathic peptide 10 showed  
313 broad-spectrum antibacterial activity, as well as increased hemolysis and cytotoxicity. This result further  
314 confirmed that perfect amphipathicity often results in increased hemolysis and cytotoxicity[35, 36].  
315 Moreover, this phenomenon showed that the antimicrobial activity and specificity of STAMPs could not  
316 be enhanced by simply increasing the amphipathicity and that increasing amphipathicity may lead to a  
317 transformation of STAMPs into broad-spectrum antimicrobial peptides.

318 Although the above structural parameters did not supply the STAMPs with ideal antibacterial activity,  
319 a delicate balance among them may be required for the design of an ideal STAMP with increased  
320 antibacterial activity and specificity. Therefore, hybrid peptides have become an attractive method to  
321 optimize these sequences[37]. In this study, we used a phage-displayed peptide that was capable of  
322 specific and strong binding to *E. coli* cells[15]. This peptide was attached to the N- or C-termini of  
323 parental peptide 2 to give peptide 11 and 12 respectively. With the fusion of 14, 11 and 12 displayed 5.0  
324 and 2.0 times increased antimicrobial activity relative to that of parental peptide 2 alone. A theory to  
325 explain this phenomenon might be that 11 and 12 have a better hydrophobic and hydrophilic phase  
326 balance than the parental peptide, resulting in enhanced antimicrobial activity because positive residues  
327 and hydrophobic residues can bind to and insert into the cytoplasmic membranes[35]. Moreover, the  
328 specific recognition ability of 11 and 12 to *E. coli* was enhanced by the addition of the phage-displayed  
329 peptide. Hemolysis and cytotoxicity are important factors that limit the clinical application of  
330 antimicrobial peptides; thus, it is important to evaluate the cytotoxic effect of peptides. Fortunately, our  
331 target peptide 11 showed lower hemolysis and cytotoxicity (Figure 3 and Figure 4) at the level of the  
332 average *E. coli* MIC value, demonstrating that the selectivity of 11 for the *E. coli* cell membrane  
333 exceeded that for mammalian cell membrane[23].

334 Previous reports have shown that the activity and cytotoxicity of peptides are often correlated with  
335 their hydrophobicity and helical tendency[38, 39]. In membrane-like environments, 11 exhibited  $\alpha$ -helical  
336 characteristics and had weaker hydrophobicity and helical tendencies than melittin, potentially indicating

337 why target peptide 11 showed antimicrobial activity against *E. coli* and low cytotoxicity. This result  
338 further confirmed that the activity and cytotoxicity were associated with the hydrophobicity and helical  
339 tendencies. Therefore, when designing hybrid peptides using a phage-displayed peptide, the optimum  
340 balance of hydrophobicity and helical tendency must be maintained.

341 Positively charged salt ions compete with peptide molecules to reduce the antibacterial activity of  
342 AMPs[38]. In our research, Na<sup>+</sup> and Mg<sup>2+</sup> compromised the antimicrobial activity of peptides other than  
343 4 against *E. coli* (Table 4). At physiological concentrations, Na<sup>+</sup> and Mg<sup>2+</sup> reduce interactions between  
344 AMPs and the membrane via the charge-shielding effect and thus reduce the antimicrobial activity  
345 against *E. coli*. Moreover, Mg<sup>2+</sup> can bind LPS on the outer membrane of *E. coli* to prevent the proximity  
346 of antibacterial peptide molecules[41, 42]. Therefore, increasing the charge can effectively replace the  
347 salt ions around the membrane by an ion-exchange mechanism. Our results showed that the increased  
348 charge of peptide 11 via terminal link phage-displayed peptide led to a reduction of salt ion sensitivity.  
349 Furthermore, previous studies have confirmed that increases in hydrophobicity can also reduce the  
350 adverse effects of salt ions on the antimicrobial activity of AMPs[43]. Peptide 4 maintained  
351 broad-spectrum antimicrobial activity at a physiological salt concentration, which might be related to  
352 both the overall hydrophobicity and the increased charge. Compared with our target peptide 11, peptide  
353 4 showed the same amount of charge as peptide 11 (+10), but the overall hydrophobicity was stronger  
354 than 11; therefore, peptide 4 showed improved salt stability. Moreover, all the designed peptides could  
355 retain their original biological activities in serum, acid and alkaline environments. In conclusion, our  
356 target peptide 11 maintained relatively satisfactory activity in a complex physiological environment  
357 compared with its parental peptide 2.

358 Previous studies have proposed that broad-spectrum AMPs exert antimicrobial activity by  
359 membrane permeabilization[44, 45]. However, the bactericidal mechanism of STAMPs is still unclear.  
360 Therefore, we added the Gram-negative bacteria *P. aeruginosa* and Gram-positive bacteria *S. aureus*  
361 as controls because previous MIC tests showed that peptide 11 did not have the ability to kill these two  
362 strains (Table 2). LPS and LTA are the main components of Gram-negative bacteria and Gram-positive  
363 bacteria, respectively, which can interact with AMPs via electrostatic interactions[44]. In our study, the  
364 binding affinity of peptide 11 to LPS and LTA showed a dose-dependent effect (Figure 5A and Figure 5B),  
365 which demonstrated that the interactions between STAMP 11 and LPS and LTA were only electrostatic  
366 and that there was no specificity between strains, so peptide 11 could accumulate on the surface of the



367 Gram-negative and Gram-positive bacterial membrane. The outer membrane is a unique component of  
368 Gram-negative bacteria, and AMP molecules must penetrate the outer membrane to get close to the  
369 cytoplasmic membrane[47]. In general, the outer membrane of all Gram-negative bacteria possesses a  
370 certain degree of permeability, allowing the exchange of small molecules and ions between the cell  
371 interior and the extracellular medium[48, 49]. Peptide 11 could enhance the outer membrane  
372 permeability of *E. coli* and *P. aeruginosa* in a dose-dependent manner (Figure 5C), but the penetration  
373 of the outer membrane was not sufficient to kill the strains. When AMPs penetrate the outer membrane  
374 and local peptides reach the threshold, AMP molecules can insert their hydrophobic cores into the  
375 phospholipid bilayer of the cytoplasmic membrane, disrupting the membrane surface potential and  
376 forming a mass of pore channels, finally resulting in cell lysis[50]. In cytoplasmic membrane  
377 depolarization assays, we demonstrated that 11 could perturb the cytoplasmic membrane potential of *E.*  
378 *coli*, had a slight effect on *P. aeruginosa*, but had no effect on *S. aureus* (Figure 5E). Therefore, we  
379 believe selective destruction of the cytoplasmic membrane of *E. coli* by 11 supports a narrow-spectrum  
380 antibacterial activity of the peptide against these cells (Figure 10). The inner membrane permeability  
381 results further indicated that 11 could induce cytoplasmic membrane leakage (Figure 5D). Direct  
382 observation by SEM and TEM further confirmed the membrane damage effects of 11 on *E. coli*. The  
383 super-resolution microscopy results showed that 11 damaged the cell membrane of *E. coli*. Furthermore,  
384 flow cytometry analysis indicated that linkage of the displayed peptide at the end of the parental peptide  
385 improved its anti-bacterial activity against *E. coli*. Altogether, 11 was observed to penetrate the outer  
386 membrane of Gram-negative bacteria and destroy the cytoplasmic membrane potential to induce the  
387 release of the cell contents, eventually leading to the death of *E. coli*.

388 Taken together, these findings provide a basic principle of peptide design and optimization to  
389 enhance the activity and specificity of narrow-spectrum antimicrobial agents. In our study, we  
390 successfully used a phage-displayed peptide to enhance the antimicrobial activity of STAMPs, while the  
391 mechanism of direct action on bacterial membranes positions peptide 11 as a potential candidate  
392 clinical treatment against *E. coli*.

393



## 394 **Conclusion**

395 In our study, we attempted to use the traditional approach to optimize a STAMP 2 with activity  
396 against *E. coli* based on the principles of peptide chain length, amphipathicity, and charge number. A  
397 series of peptides were synthesized and tested for their anti-bacterial properties, hemolytic activity,  
398 cytotoxicity, and sensitivity. We found that STAMP is different from broad-spectrum antimicrobial  
399 peptides, and it is difficult to achieve a satisfactory effect by changing only one parameter. In contrast,  
400 we propose a feasible approach for the optimization of STAMP via the conjugation phage-displayed  
401 peptide, which enhances STAMP antimicrobial potency and stability. In our system, 11 showed  
402 enhanced narrow-antimicrobial activity against *E. coli* ( $TI_{all}=0.028$ ), while it had relatively high cell  
403 selectivity. Peptide 11 accumulated on the surface of the membrane by binding LPS and LTA of negative  
404 bacteria and positive bacteria, respectively, and permeabilized the outer membrane of Gram-negative  
405 bacteria, but it only induced depolarization of the cytoplasmic membrane in *E. coli*, disrupting the inner  
406 membrane integrity and eventually leading to target cell death. In summary, these results demonstrate a  
407 potential method for the design or optimization of STAMPs. Simultaneously, peptide 11 has potential as  
408 a novel agent against *E. coli* to help in preventing related diseases.

## 409 **Materials and Methods**

### 410 **Bacterial strains**

411 The bacterial strains *E. coli* ATCC25922, *E. coli* 078, *E. coli* K88, *E. coli* K99, *E. coli* 987P, *P.*  
412 *aeruginosa* ATCC27853, *S. agalactiae* ATCC13813, *S. typhimurium* C7731, *S. aureus* 25923, *S. aureus*  
413 29213 and *S. epidermidis* ATCC12228 were obtained from the College of Veterinary Medicine,  
414 Northeast Agricultural University. *E. coli* UB1005 was kindly provided by the State Key Laboratory of  
415 Microbial Technology, Shandong University. *L. plantarum* 8014, *L. rhamnosus* 7469, *L. rhamnosus*  
416 1.0911, *L. rhamnosus* 1.9205, *L. rhamnosus* 1.0385, and *L. rhamnosus* 1.0386 were obtained from the  
417 Key Laboratory of Food College, Northeast Agricultural University.

### 418 **Materials**

419 Mueller-Hinton Broth (MHB) and Lactobacilli MRS Broth powder were obtained from AoBoX  
420 (China). Sodium dodecyl sulfate (SDS) was purchased from Sigma-Aldrich (China) and trifluoroethanol  
421 (TFE) was obtained from Amresco (U.S.A.). SDS and TFE were used after dilution to the desired  
422 concentration. Bovine serum albumin (BSA), *N*-phenyl-1-naphthylamine (NPN),  
423 3,3-dipropylthiadicarbocyanine (diSC3-5), *o*-nitrophenyl- $\beta$ -D-galactopyranoside (ONPG), Triton X-100,  
424 lipopolysaccharide (LPS) from *E. coli* 0111:B4, lipopolysaccharide (LPS) from *P. aeruginosa* 10,  
425 lipoteichoic acid (LTA) from *S. aureus*, 4-(2-hydroxyethyl)piperazine-1-ethanesulfonic acid (HEPES),  
426 ethanol (analytical grade, >99%), 3-(4,5-dimethylthiazol-2-yl)-2,5-diphenyltetrazolium bromide (MTT),  
427 tertiary butanol (analytical grade, 99%), acetone (analytical grade, 99%), glutaraldehyde (synthetic  
428 grade, 50% in H<sub>2</sub>O), propidium iodide (PI) and BODIPY-TR-cadaverine (BC) were purchased from  
429 Sigma-Aldrich (China). RPMI 1640, medium-high glucose (DMEM) and DMEM/F-12 and fetal bovine  
430 serum (FBS) were obtained from Gibco (China). Human embryonic kidney cells (HEK293T) and  
431 intestinal porcine enterocyte cells (IPEC-J2) were obtained from the College of Animal Science and  
432 Technology, Northeast Agricultural University (Harbin, China).

### 433 **Circular dichroism (CD) analysis**

434 CD spectra were recorded at 25°C with a J-820 spectropolarimeter (Jasco, Tokyo, Japan). A 1.0  
435 mm path length quartz cell containing a peptide (150  $\mu$ M) solution was used along with 10 mM PBS, 30  
436 mM SDS and 50% trifluoroethanol (TFE). At least three scans were acquired and averaged to improve  
437 the signal-to-noise ratio at 250-190 nm. The acquired CD spectra were then converted to the mean

438 residue ellipticity using the following equation:

$$439 \quad \theta_M = (\theta_{\text{obs}} \times 1000) / (c \times l \times n)$$

440 Where  $\theta_M$  is the residue ellipticity ( $\text{deg} \times \text{cm}^2 \times \text{dmol}^{-1}$ ),  $\theta_{\text{obs}}$  is the measured ellipticity corrected for  
441 the buffer at a given wavelength (mdeg),  $c$  is the peptide concentration (mM),  $l$  is the optical path length  
442 (mm), and  $n$  is the number of amino acids.

### 443 **Determination of the minimum inhibitory concentration (MIC)**

444 Pathogenic strains cells were cultured in Mueller-Hinton Broth (MHB), whereas beneficial strains  
445 were cultured in Lactobacilli MRS Broth (MRS). The MIC was determined in a 96-well plate. Briefly,  
446 logarithmic phase cultures of pathogenic strains and beneficial strains were diluted in MHB and MRS to  
447 a final concentration of  $10^5$  CFU/mL, the series of peptides were serially diluted in 0.2% BSA solution,  
448 and the plate wells received aliquots of 50  $\mu\text{L}$  each of the culture suspension followed by the addition of  
449 50  $\mu\text{L}$  of the diluted peptide; the final concentrations were 1, 2, 4, 8, 16, 32, 64, and 128  $\mu\text{M}$ . Positive  
450 controls containing cells alone were incorporated. After incubation for 24-25 hours at  $37^\circ\text{C}$ , the optical  
451 density (OD) at 492 nm (Tecan, Austria) was measured, and the MIC was determined as the lowest  
452 concentration of peptide that resulted in inhibition of 95% of the bacterial growth. A minimum of three  
453 independent experiments (biological replicates) were conducted.

### 454 **Hemolytic activity test**

455 The hemolytic activity of the peptides was determined according to a previously described  
456 method[49]. Fresh human red blood cells (hRBCs) were obtained from a healthy donor at the Hospital  
457 of Northeast Agricultural University. The hRBCs were pelleted by centrifugation and washed three times  
458 with PBS ( $1,000 \times g$ ,  $4^\circ\text{C}$ , 5min). Then, the hRBCs were diluted 1:10 in 10 mM PBS (PH 7.4). Next, 50  
459  $\mu\text{L}$  of the hRBC solution and different concentrations of each peptide were mixed and incubated for 1 h  
460 at  $37^\circ\text{C}$ . The 96-well plate was centrifuged, and the supernatant was transferred to a new plate.  
461 Negative and positive controls for hemolytic activity were considered the hRBC suspension and hRBCs  
462 lysed with 0.1% Triton X-100 in PBS, respectively. Hemoglobin release upon lysis of the hRBCs was  
463 monitored at 570 nm using a microplate reader (TECAN GENios F129004; TECAN, Austria). The  
464 peptide concentration causing 5% hemolysis was considered to be the minimal hemolytic concentration  
465 (MHC). Hemolysis was calculated using the following equation:

$$466 \quad \text{Hemolysis(\%)} = [(A_{570} \text{ test sample} - A_{570} \text{ negative control}) / (A_{570} \text{ positive control} - A_{570} \text{ negative$$

467 control]] $\times 100\%$ .

## 468 **Cytotoxicity assay**

469 HEK293T and IPEC-J2 cells were used to assess the cytotoxicity of synthetic peptides by the MTT  
470 assay[50]. The cells ( $2.0 \times 10^5$  cells/well in high-glucose DMEM or DMEM/F-12) were added to a 96-well  
471 plate, mixed in equal volumes with various concentrations of peptides (2-128  $\mu\text{M}$ ) and then incubated  
472 for 24 h at 37°C in 5%  $\text{CO}_2$ . Cells without peptides served as controls. Next, the medium was replaced  
473 with 50 $\mu\text{L}$  of an MTT solution (0.5 mg/mL) and incubated for 4 h at 37°C. Subsequently, the formazan  
474 crystals were dissolved by the addition of 150  $\mu\text{L}$  DMSO added to each well. The OD at 570 nm was  
475 observed using a microplate reader (TECAN GENios F129004; TECAN, Austria). The results were from  
476 three independent assays.

## 477 **Salt, Serum, Acid and Alkaline sensitivity**

478 Each salt powder at a physiological concentration (300 mM NaCl, 9 mM KCl, 2 mM  $\text{MgCl}_2$ , 16  $\mu\text{M}$   
479  $\text{ZnCl}_2$ , 12  $\mu\text{M}$   $\text{NH}_4\text{Cl}$ , and 6  $\mu\text{M}$   $\text{FeCl}_3$ ) was dissolved in BSA stock solutions of polymer, and the  
480 subsequent steps were consistent with the MIC determination method. To evaluate the effect of serum,  
481 acid and alkaline conditions on antimicrobial activity, the peptides were incubated at three different  
482 serum levels (100%, 50%, 25%) and four different pH levels (pH=2, pH=4, pH=10, pH=12) for 4 h prior  
483 to MIC determination.

## 484 **LPS and LTA binding assay**

485 LPS from *E. coli* O111:B4 and *P. aeruginosa* 10 and LTA from *S. aureus* were mixed with BC in 50  
486 mL of Tris buffer (pH=7.4) and the solutions were incubated at room temperature for 4 h. Different  
487 concentrations of peptide in 50  $\mu\text{L}$  were added to a 96-well plate after serial dilution. Then, a 50  $\mu\text{L}$   
488 aliquot of the LPS-probe mixture and LTA-probe mixture were added to each well. Subsequently, the  
489 fluorescence was measured (excitation  $\lambda=580$  nm, emission  $\lambda=620$  nm) on a spectrofluorophotometer  
490 (Infinite 200 pro, Tecan, China). Each test was performed independently in triplicate.

$$491 \quad \% \Delta F(\text{AU}) = (F_{\text{obs}} - F_0) / (F_{100} - F_0) \times 100\%$$

492 where  $F_{\text{obs}}$  is the observed fluorescence at a given peptide concentration,  $F_0$  is the initial fluorescence of  
493 BC with LPS (or LTA) in the absence of peptides, and  $F_{100}$  is the BC fluorescence with LPS (or LTA) cells  
494 upon addition of 20  $\mu\text{g}/\text{mL}$  polymyxin B, which has a strong affinity for LPS and LTA as a positive  
495 control.

## 496 **Outer membrane permeability**

497 *E. coli* 25922 and *P. aeruginosa* 27853 cells were suspended to 0.2 OD at 600 nm and incubated  
498 for 30 min in 5 mM HEPES buffer (pH 7.4, containing 5 mM glucose) containing 10  $\mu$ M NPN.  
499 Subsequently, 100  $\mu$ L of the cell suspension and 100  $\mu$ L peptides of different concentrations (0.5-16  $\mu$ M)  
500 were added to the 96-well plate. Fluorescence was recorded (excitation  $\lambda$ =350 nm, emission  $\lambda$ =420 nm  
501 with an F-4500 fluorescence spectrophotometer (Hitachi; Tokyo, Japan). Fluorescence was recorded  
502 until the fluorescence intensity remained constant. The values were converted to the percent NPN  
503 uptake using the following equation:

$$504 \quad \text{NPN uptake (\%)} = (F_{\text{obs}} - F_0) / (F_{100} - F_0) \times 100\%$$

505 where  $F_{\text{obs}}$  is the observed fluorescence at a given peptide concentration,  $F_0$  is the initial fluorescence of  
506 NPN with *E. coli* and cells in the absence of peptides, and  $F_{100}$  is the fluorescence of NPN upon addition  
507 of 10  $\mu$ g/mL polymyxin B.

## 508 **Inner membrane permeability**

509 The ability of peptides to permeate the inner membrane of *E. coli* 25922 was assessed using  
510 cytoplasmic  $\beta$ -galactosidase with ONPG. *E. coli* 25922 cells, which were grown using MHB medium  
511 containing 2% lactose and centrifuged (5000 g, 5 min) to collect cells when the bacteria were in the  
512 mid-log phase. Then, the cells were suspended to 0.05 at 600 nm in 10 mM PBS (pH 7.4, containing 1.5  
513 mM ONPG). Subsequently, 150  $\mu$ L of bacterial culture and 50  $\mu$ L of the peptide solution (final  
514 concentration of 2  $\mu$ M) were added to a 96-well plate. The time-dependent effect of the peptides on  
515 ONPG fluorescence was measured at an absorbance wavelength of 420 nm.

## 516 **Cytoplasmic membrane depolarization**

517 *E. coli* 25922, *P. aeruginosa* 27853 and *S. aureus* 29213 cells were grown to the mid-log phase at  
518 37°C and diluted to an OD<sub>600</sub> of 0.05 in 5 mM HEPES buffer (pH 7.4, containing 20 mM glucose). The  
519 cell suspension containing the 4  $\mu$ M diSC3-5 was incubated for 1 h, and then, 100 mM KCl was added  
520 and incubated for 0.5 h. A 2 ml cell suspension was placed in a 24-well plate, and a peptide at a final  
521 concentration of 2  $\mu$ M was added. The fluorescence was continuously measured for 800 s using an  
522 F-4500 fluorescence spectrophotometer (Hitachi, Japan) with an excitation wavelength of 622 nm and  
523 an emission wavelength of 670 nm, and the background fluorescence was measured.

## 524 **SEM characterization**

525 *E. coli* 25922, *P. aeruginosa* 27853 and *S. aureus* 29213 cells were cultured in MHB at 37°C under  
526 constant shaking at 220 rpm until the logarithmic phase of growth and harvested by centrifugation. The  
527 precipitates were washed twice with 10 mM PBS and re-suspended to 0.2 OD at 600 nm. Then,  
528 bacterial cells were incubated at 37°C up to 60 min with peptides at a concentration of 2 µM.  
529 Subsequently, the samples were harvested (5000 g, 5 min) and fixed with 2.5% glutaraldehyde at 4°C  
530 overnight. The cells were dehydrated for 10 min in each of a graded ethanol series (50, 70, 90, and  
531 100%). The cells have then transferred to a mixture (v: v = 1: 1) of 100% ethanol and tertiary butanol  
532 and absolute tertiary butanol for 15 min. Finally, the specimens were dehydrated in a critical point dryer  
533 with liquid CO<sub>2</sub>, and the dehydrated specimens were coated with gold-palladium and observed using a  
534 Hitachi S-4800 SEM (Hitachi, Japan).

### 535 **TEM characterization**

536 Pretreatment with the bacterial samples was conducted in the same way as for SEM treatment.  
537 After treatment with a series of ethanol solutions (50, 70, 90, 100%) for 8 min, the samples have then  
538 transferred to a mixture (v: v = 1: 1) of 100% ethanol and acetone and absolute acetone for 15 min.  
539 Subsequently, the specimens were transferred to 1:1 mixture of absolute acetone and resin for 30 min  
540 and then to absolute epoxy resin overnight. Finally, the specimens were stained with uranyl acetate and  
541 lead citrate and observed using a Hitachi H-7650 TEM (Hitachi, Japan).

### 542 **Super-resolution microscopy (SRM)**

543 *E. coli* 25922 cells were incubated in the presence of FITC-labeled peptide 11 at 2 µM at 37°C for  
544 60 min. The mixture was centrifuged (1000 g, 5 min) and washed two times with PBS buffer. Then, the  
545 cells were resuspended and incubated with 10 µg/mL PI in PBS buffer for 15 min at 4 °C, and the  
546 extracellular PI dye was removed by centrifugation. A smear was created, and images were captured  
547 using a Deltavision OMX system with a 488 and 535 nm band pass filter for FITC and PI excitation,  
548 respectively.

### 549 **Flow cytometry**

550 *E. coli* 25922, *P. aeruginosa* 27853 and *S. aureus* 29213 cells were diluted to  $1 \times 10^7$  cells ml<sup>-1</sup> in  
551 PBS, and the peptide at a final concentration of 2 µM was incubated in the bacterial suspension at a PI  
552 concentration of 10 µg/ml for 60 min at room temperature. Images were obtained using a FACS flow  
553 cytometer (Bacton-Dickinson, USA) with a laser excitation wavelength of 488 nm.

### 554 **Statistical analysis**

555 All data were subjected to one-way analysis of variance (ANOVA), and significant differences  
556 between means were evaluated by the Tukey test for multiple comparisons. The data were analyzed  
557 using the Statistical Package for the Social Sciences (SPSS) version 16.0 (Chicago, Illinois, USA).  
558 Quantitative data are presented as the means  $\pm$  standard deviation (SD).  $P < 0.05$  was considered  
559 statistically significant.

560

## 561 **Acknowledgments**

562 This work was supported by the National Natural Science Foundation of China (31672434, 31472104,  
563 31872368), and the China Agriculture Research System (CARS-35).

## 564 **Notes**

565 The authors declare no competing financial interest.

## 566 **Author Contributions**

567 P.T. and Z.L. contributed equally to this work, and they are both co-first-authors. P.T. and A.S. designed  
568 and conceived the experiments. P.T. and Z.L. and Y.Z. conducted the main experiments assay. P.T. wrote  
569 the main manuscript text. C.S. and M.U.A and W.L. and X.Z. and A.S. supervised the work and revised  
570 the final version of the manuscript. All of the authors have read and approved the final version of the  
571 manuscript.



## 572 References

- 573 1. Wang J, Chou S, Yang Z, Yang Y, Wang Z, Song J, et al. 2018. Combating drug-resistant fungi with  
574 novel imperfectly amphipathic palindromic peptides. *Journal of Medicinal Chemistry* 61:3889-907.
- 575 2. Holaskova E, Galuszka P, Frebort I, Oz MT. 2015. Antimicrobial peptide production and plant-based  
576 expression systems for medical and agricultural biotechnology. *Biotechnology Advances* 33(6):1005-23.
- 577 3. Dong N, Zhu X, Chou S, Shan A, Li W, Jiang J. 2014. Antimicrobial potency and selectivity of simplified  
578 symmetric-end peptides. *Biomaterials* 35(27):8028-39.
- 579 4. Zhu X, Shan A, Ma Z, Xu W, Wang J, Chou S, et al. 2015. Bactericidal efficiency and modes of action of  
580 the novel antimicrobial peptide T9W against *Pseudomonas aeruginosa*. *Antimicrobial Agents &*  
581 *Chemotherapy* 59(6):3008-17.
- 582 5. Eckert R, Sullivan R, Shi W. 2012. Targeted antimicrobial treatment to re-establish a healthy microbial  
583 flora for long-term protection. *Advances in dental research* 24(2):94-7.
- 584 6. Eckert R, He J, Yarbrough DK, Qi F, Anderson MH, Shi W. 2006. Targeted Killing of *Streptococcus*  
585 *mutans* by a Pheromone-Guided "Smart" Antimicrobial Peptide. *Antimicrob Agents Chemother*  
586 50(11):3651-7.
- 587 7. Ong ZY, Wiradharma N, Yang YY. 2014. Strategies employed in the design and optimization of  
588 synthetic antimicrobial peptide amphiphiles with enhanced therapeutic potentials. *Adv Drug Deliv Rev*  
589 78:28-45.
- 590 8. Shao C, Tian H, Wang T, Wang Z, Chou S, Shan A, et al. 2018. Central  $\beta$ -turn increases the cell  
591 selectivity of imperfectly amphipathic  $\alpha$ -helical peptides. *Acta Biomater* 69:243-55.
- 592 9. Wang X, Teng D, Mao R, Yang N, Hao Y, Wang J. 2017. Combined Systems Approaches Reveal a  
593 Multistage Mode of Action of a Marine Antimicrobial Peptide against Pathogenic *Escherichia coli* and Its  
594 Protective Effect against Bacterial Peritonitis and Endotoxemia. *Antimicrobial Agents & Chemotherapy*  
595 61(1):AAC.01056-16.
- 596 10. Kaper JB, Nataro JP, Mobley HLT. 2005. Pathogenic *Escherichia coli*. *International Journal of Medical*  
597 *Microbiology* 295(6):355-6.
- 598 11. Pedron CN, Torres MDT, Lima JADS, Silva PID, Silva FDD, Oliveira VX. 2017. Novel designed VmCT1  
599 analogs with increased antimicrobial activity. *European Journal of Medicinal Chemistry* 126:456.
- 600 12. Xiaoxiao G, Chengbang M, Qiang D, Ran W, Lei W, Mei Z, et al. 2013. Two peptides, TsAP-1 and  
601 TsAP-2, from the venom of the Brazilian yellow scorpion, *Tityus serrulatus*: evaluation of their antimicrobial  
602 and anticancer activities. *Biochimie* 95(9):1784-94.
- 603 13. Huang JX, Bishop-Hurley SL, Cooper MA. 2012. Development of anti-infectives using phage display:  
604 biological agents against bacteria, viruses, and parasites. *Antimicrobial Agents & Chemotherapy*  
605 56(56):4569-82.
- 606 14. Sotto A. 2012. A mathematical model to guide antibiotic treatment strategies. *Bmc Medicine* 10(1):90.
- 607 15. Qiao Y, Yang C, Coady DJ, Ong ZY, Hedrick JL, Yang Y-Y. 2012. Highly dynamic biodegradable  
608 micelles capable of lysing Gram-positive and Gram-negative bacterial membrane. *Biomaterials*  
609 33(4):1146-53.
- 610 16. Wang J, Chou S, Xu L, Zhu X, Dong N, Shan A, et al. 2015. High specific selectivity and  
611 Membrane-Active Mechanism of the synthetic centrosymmetric  $\alpha$ -helical peptides with Gly-Gly pairs.  
612 *Scientific Reports* 5:15963.



- 613 17. Diao YJ. 2014. Low-cost high throughput screening method of antibacterial peptide lead compound. CN;
- 614 18. Jong Kook L, Ramamourthy G, Seong-Cheol P, Hyun Sook K, Yangmee K, Kyung-Soo H, et al. 2013. A
- 615 proline-hinge alters the characteristics of the amphipathic  $\alpha$ -helical AMPs. *PLoS One* 8(7):e67597.
- 616 19. Chou S, Shao C, Wang J, Shan A, Xu L, Dong N, et al. 2016. Short, multiple-stranded  $\beta$ -hairpin peptides
- 617 have antimicrobial potency with high selectivity and salt resistance. *Acta Biomater* 30:78-93.
- 618 20. Jacob B, Kim Y, Hyun JK, Park IS, Bang JK, Song YS. 2014. Bacterial killing mechanism of sheep
- 619 myeloid antimicrobial peptide-18 (SMAP-18) and its Trp-substituted analog with improved cell selectivity and
- 620 reduced mammalian cell toxicity. *Amino Acids* 46(1):187-98.
- 621 21. Qi X, Zhou C, Peng L, Xu W, Ye C, Hua L, et al. 2010. Novel short antibacterial and antifungal peptides
- 622 with low cytotoxicity: Efficacy and action mechanisms. *Biochemical & Biophysical Research Communications*.
- 623 398(3):594-600.
- 624 22. Burgess DJ. 2014. Microbial genetics: Amplified origins of antibiotic resistance. *Nature Reviews*
- 625 *Genetics* 12(6):89-96.
- 626 23. Takahashi D, Shukla SK, Prakash O, Zhang G. 2010. Structural determinants of host defense peptides
- 627 for antimicrobial activity and target cell selectivity. *Biochimie* 92(9):1236-41.
- 628 24. Zhenheng Lai, Peng Tan, Yongjie Zhu, Changxuan Shao, Anshan Shan, Lu Li. 2019. Highly Stabilized
- 629  $\alpha$ -Helical Coiled Coils Kill Gram-negative Bacteria by Multi-complementary Mechanisms under Acidic
- 630 Condition. *Applied Materials & Interfaces* 259(1):103-6.
- 631 25. Liu Y, Xia X, Xu L, Wang Y. 2013. Design of hybrid  $\beta$ -hairpin peptides with enhanced cell specificity and
- 632 potent anti-inflammatory activity. *Biomaterials* 34(1):237-50.
- 633 26. Huang JF, Xu YM, Hao DM, Huang YB, Liu Y, Chen Y. 2010. Structure-guided de novo design of
- 634  $[\alpha]$ -helical antimicrobial peptide with enhanced specificity. *Pure & Applied Chemistry* 82(1):243-57.
- 635 27. Wieprecht T, Dathe M, Beyermann M, Krause E, Maloy WL, Macdonald DL, et al. 1997. Peptide
- 636 hydrophobicity controls the activity and selectivity of magainin 2 amide in interaction with membranes.
- 637 *Biochemistry* 36(20):6124-32.
- 638 28. Dathe M, Nikolenko H, Meyer J, Beyermann M, Bienert M. 2001. Optimization of the antimicrobial
- 639 activity of magainin peptides by modification of charge. *Febs Letters* 501(2):146-50.
- 640 29. Lum KY, Tay ST, Le CF, Lee VS, Sabri NH, Velayuthan RD, et al. 2015. Activity of Novel Synthetic
- 641 Peptides against *Candida albicans*. *Scientific Reports* 5:9657.
- 642 30. Sani MA, Separovic F. 2016. How Membrane-Active Peptides Get into Lipid Membranes. *Accounts of*
- 643 *Chemical Research* 49(6):1130-8.
- 644 31. Pillong M, Hiss JA, Schneider P, Lin YC, Posselt G, Pfeiffer B, et al. 2017. Rational Design of
- 645 Membrane-Pore-Forming Peptides. *Small* 13(40):1701316.
- 646 32. Zhan YO, Gao SJ, Yang YY. 2013. Short Synthetic  $\beta$ -Sheet Forming Peptide Amphiphiles as Broad
- 647 Spectrum Antimicrobials with Antibiofilm and Endotoxin Neutralizing Capabilities. *Adv Funct Mater*
- 648 23(29):3682-92.
- 649 33. Wiradharma N, Khoe U, Hauser CAE, Seow SV, Zhang S, Yang YY. 2011. Synthetic cationic
- 650 amphiphilic  $\alpha$ -helical peptides as antimicrobial agents. *Biomaterials* 32(8):2204-12.
- 651 34. Wen S, Majerowicz M, Waring A, Bringezu F. 2007. Dicynthaurin (ala) monomer interaction with
- 652 phospholipid bilayers studied by fluorescence leakage and isothermal titration calorimetry. *J Phys Chem B*
- 653 111(22):6280-7.
- 654 35. Zhu X, Dong N, Wang ZY, Ma Z, Zhang LC, Ma QQ, et al. 2014. Design of imperfectly amphipathic

- 655 alpha-helical antimicrobial peptides with enhanced cell selectivity. *Acta Biomater* 10(1):244-57.
- 656 36. Khara JS, Obuobi S, Ying W, Hamilton MS, Robertson BD, Newton SM, et al. 2017. Disruption of  
657 drug-resistant biofilms using de novo designed short  $\alpha$ -helical antimicrobial peptides with idealized facial  
658 amphiphilicity. *Acta Biomater* 57:103.
- 659 37. Chen CX, Yang C, Chen YC, Wang F, Mu QM, Zhang J, et al. 2016. Surface Physical Activity and  
660 Hydrophobicity of Designed Helical Peptide Amphiphiles Control Their Bioactivity and Cell Selectivity. *Acs*  
661 *Applied Materials & Interfaces* 8(40):26501-10.
- 662 38. Nikken W, Sng MYS, Majad K, Zhan-Yuin O, Yi-Yan Y. 2013. Rationally designed  $\alpha$ -helical  
663 broad-spectrum antimicrobial peptides with idealized facial amphiphilicity. *Macromol Rapid Commun*  
664 34(1):74-80.
- 665 39. Fox MA, Thwaite JE, Ulaeto DO, Atkins TP, Atkins HS. 2012. Design and characterization of novel  
666 hybrid antimicrobial peptides based on cecropin A, LL-37 and magainin II. *Peptides* 33(2):197-205.
- 667 40. Brogden NK, Brogden KA. 2011. Will new generations of modified antimicrobial peptides improve their  
668 potential as pharmaceuticals? *Int J Antimicrob Agents* 38(3):217-25.
- 669 41. Schmidtchen A, Pasupuleti M, Malmsten M. 2014. Effect of hydrophobic modifications in antimicrobial  
670 peptides. *Advances in Colloid & Interface Science* 205(12):265-74.
- 671 42. Goldman MJ, Anderson GM, Stolzenberg ED, Kari UP, Zasloff M, Wilson JM. 1997. Human  
672  $\beta$ -Defensin-1 Is a Salt-Sensitive Antibiotic in Lung That Is Inactivated in Cystic Fibrosis. *Cell* 88(4):553-60.
- 673 43. Huang J, Hao D, Chen Y, Xu Y, Tan J, Huang Y, et al. 2011. Inhibitory effects and mechanisms of  
674 physiological conditions on the activity of enantiomeric forms of an  $\alpha$ -helical antibacterial peptide against  
675 bacteria. *Peptides* 32(7):1488-95.
- 676 44. Dou X, Zhu X, Wang J, Dong N, Shan A. 2017. Novel Design of Heptad Amphiphiles To Enhance Cell  
677 Selectivity, Salt Resistance, Antibiofilm Properties and Their Membrane-Disruptive Mechanism. *Journal of*  
678 *Medicinal Chemistry* 60(6):2257.
- 679 45. Hui-Yuan Y, Chih-Hsiung T, Bak-Sau Y, Heng-Li C, Hsi-Tsung C, Kuo-Chun H, et al. 2011. Easy  
680 strategy to increase salt resistance of antimicrobial peptides. *Antimicrobial Agents & Chemotherapy*  
681 55(10):4918-21.
- 682 46. Anna M, Wilksch JJ, Huabin W, Mohammed Akhter H, Wade JD, Frances S, et al. 2016. Atomic Force  
683 Microscopy Reveals the Mechanobiology of Lytic Peptide Action on Bacteria. *Langmuir the Acs Journal of*  
684 *Surfaces & Colloids* 31(22):6164-71.
- 685 47. Erik S, Ulrich AS. 2015. AMPs and OMPs: Is the folding and bilayer insertion of  $\beta$ -stranded outer  
686 membrane proteins governed by the same biophysical principles as for  $\alpha$ -helical antimicrobial peptides? *BBA*  
687 - *Biomembranes* 1848(9):1944-54.
- 688 48. Rosenfeld Y, Shai Y. 2006. Lipopolysaccharide (Endotoxin)-host defense antibacterial peptides  
689 interactions: Role in bacterial resistance and prevention of sepsis. *Biochimica Et Biophysica Acta*  
690 1758(9):1513-22.
- 691 49. Wada A, Kono M, Kawauchi S, Takagi Y, Morikawa T, Funakoshi K. 2012. Rapid discrimination of  
692 Gram-positive and Gram-negative bacteria in liquid samples by using NaOH-sodium dodecyl sulfate solution  
693 and flow cytometry. *PLoS One* 7(10):e47093.
- 694 50. Epand RM, Walker C, Epand RF, Magarvey NA. 2016. Molecular mechanisms of membrane targeting  
695 antibiotics. *Biochimica Et Biophysica Acta* 1858(5):980-7.
- 696 51. Epand RF, Sarig H, Mor A, Epand RM. 2009. Cell-Wall Interactions and the Selective Bacteriostatic

- 697 Activity of a Miniature Oligo-Acyl-Lysyl. Biophysical Journal 97(8):2250-7.  
698 52. Teixeira V, Feio MJ, Bastos M. 2012. Role of lipids in the interaction of antimicrobial peptides with  
699 membranes. Prog Lipid Res 51(2):149-77.  
700



**Table 2** MICs<sup>a</sup>( $\mu$ M) of the Engineered Peptides against pathogenic or beneficial strains.

|                             | Minimum inhibitory concentration (MIC) in $\mu$ M |      |      |     |      |      |      |      |      |      |      |      |     |      |
|-----------------------------|---------------------------------------------------|------|------|-----|------|------|------|------|------|------|------|------|-----|------|
|                             | 1                                                 | 2    | 3    | 4   | 5    | 6    | 7    | 8    | 9    | 10   | 11   | 12   | MLT | 14   |
| <b>Pathogenic strains</b>   |                                                   |      |      |     |      |      |      |      |      |      |      |      |     |      |
| <i>E. coli</i> 25922        | >128                                              | 16   | 4    | 2   | 8    | 8    | 32   | 16   | 16   | 8    | 2    | 8    | 4   | 64   |
| <i>E. coli</i> UB1005       | >128                                              | 16   | 2    | 1   | 4    | 4    | 16   | 8    | 8    | 8    | 2    | 8    | 2   | 128  |
| <i>E. coli</i> K88          | >128                                              | 8    | 2    | 0.5 | 8    | 8    | 16   | 16   | 16   | 8    | 4    | 4    | 2   | 64   |
| <i>E. coli</i> K99          | >128                                              | 16   | 2    | 1   | 16   | 32   | 16   | 32   | 16   | 4    | 4    | 8    | 2   | 64   |
| <i>E. coli</i> 078          | >128                                              | 32   | 8    | 2   | 64   | 64   | 128  | 64   | 128  | 16   | 8    | 32   | 4   | >128 |
| <i>E. coli</i> 987P         | >128                                              | 16   | 2    | 1   | 8    | 8    | 16   | 16   | 8    | 2    | 2    | 4    | 2   | 128  |
| <i>S. aureus</i> 29213      | >128                                              | >128 | 32   | 4   | >128 | >128 | >128 | >128 | >128 | 4    | >128 | >128 | 4   | >128 |
| <i>S. aureus</i> 25923      | >128                                              | >128 | 32   | 4   | >128 | >128 | >128 | >128 | >128 | 8    | >128 | >128 | 4   | >128 |
| <i>S. epidermidis</i> 12228 | >128                                              | >128 | 16   | 2   | >128 | >128 | 128  | >128 | >128 | 4    | >128 | 128  | 4   | >128 |
| <i>P. aeruginosa</i> 27853  | >128                                              | >128 | 16   | 2   | >128 | >128 | >128 | >128 | >128 | 4    | 64   | >128 | 4   | >128 |
| <i>S. typhimurium</i> 7731  | >128                                              | 128  | 32   | 2   | 128  | 128  | >128 | >128 | 64   | 128  | 64   | 128  | 4   | >128 |
| <i>S. agalactiae</i> 13813  | >128                                              | >128 | >128 | 2   | >128 | >128 | >128 | >128 | >128 | 8    | >128 | >128 | 4   | >128 |
| <b>Beneficial strains</b>   |                                                   |      |      |     |      |      |      |      |      |      |      |      |     |      |
| <i>L. plantarum</i> 8014    | >128                                              | >128 | >128 | 64  | >128 | >128 | >128 | >128 | >128 | 128  | >128 | >128 | 2   | >128 |
| <i>L. rhamnosus</i> 7469    | >128                                              | >128 | >128 | 64  | >128 | >128 | >128 | >128 | >128 | 128  | >128 | >128 | 2   | >128 |
| <i>L. rhamnosus</i> 1.9205  | >128                                              | >128 | >128 | 32  | >128 | >128 | >128 | >128 | 128  | >128 | >128 | >128 | 2   | >128 |
| <i>L. rhamnosus</i> 1.9011  | >128                                              | >128 | >128 | 64  | >128 | >128 | >128 | >128 | 128  | >128 | >128 | >128 | 2   | >128 |
| <i>L. rhamnosus</i> 1.0385  | >128                                              | >128 | >128 | 32  | >128 | >128 | >128 | >128 | 64   | 128  | >128 | >128 | 2   | >128 |
| <i>L. rhamnosus</i> 1.0386  | >128                                              | >128 | >128 | 64  | >128 | >128 | >128 | >128 | >128 | >128 | >128 | >128 | 4   | >128 |

<sup>a</sup> Minimum inhibitory concentration (MIC,  $\mu$ M) was determined as the lowest concentration of peptide that inhibited 95% of the bacterial growth. Data are representative of three independent experiments.

| Peptide | MHC <sup>a</sup> | GM <sup>b</sup> |                                 |                    | SI <sup>d</sup> |                                 | TI <sup>e</sup>    |       |  |
|---------|------------------|-----------------|---------------------------------|--------------------|-----------------|---------------------------------|--------------------|-------|--|
|         |                  | <i>E. coli</i>  | Pathogenic strains <sup>c</sup> | Beneficial strains | <i>E. coli</i>  | Pathogenic strains <sup>c</sup> | Beneficial strains | All   |  |
| 1       | >128             | 256.000         | 256.000                         | 256.000            | 1.000           | 1.000                           | 1.000              | 1.000 |  |
| 2       | >128             | 16.000          | 228.070                         | 256.000            | 16.000          | 0.070                           | 0.063              | 0.067 |  |
| 3       | >128             | 2.828           | 35.919                          | 256.000            | 90.523          | 0.079                           | 0.011              | 0.040 |  |
| 4       | 16               | 1.122           | 2.520                           | 50.797             | 14.260          | 0.445                           | 0.022              | 0.233 |  |
| 5       | >128             | 11.314          | 228.070                         | 256.000            | 22.627          | 0.050                           | 0.044              | 0.047 |  |
| 6       | >128             | 12.699          | 228.070                         | 256.000            | 20.159          | 0.056                           | 0.050              | 0.053 |  |
| 7       | >128             | 25.398          | 228.070                         | 256.000            | 10.080          | 0.111                           | 0.099              | 0.105 |  |
| 8       | >128             | 20.159          | 256.000                         | 256.000            | 12.699          | 0.079                           | 0.079              | 0.079 |  |
| 9       | >128             | 17.959          | 203.187                         | 161.270            | 14.255          | 0.088                           | 0.111              | 0.100 |  |
| 10      | >128             | 6.350           | 8.980                           | 181.019            | 40.315          | 0.707                           | 0.040              | 0.376 |  |
| 11      | >128             | 3.175           | 161.270                         | 256.000            | 80.630          | 0.020                           | 0.035              | 0.028 |  |
| 12      | >128             | 8.000           | 203.187                         | 256.000            | 32.000          | 0.039                           | 0.031              | 0.035 |  |
| MLT     | 2                | 2.520           | 4.000                           | 2.245              | 0.794           | 0.630                           | 1.122              | 0.876 |  |
| 14      | >128             | 101.594         | 256.000                         | 256.000            | 2.520           | 0.397                           | 0.397              | 0.397 |  |

**Table 3** MHC, GM, SI and TI Values of the Engineered Peptides.

<sup>a</sup>MHC is the minimum hemolytic concentration that caused 5% hemolysis of human red blood cells. When no detectable hemolytic activity was observed at 128  $\mu$ M, a value of 256  $\mu$ M was used to calculate the selectivity index.

<sup>b</sup>The geometric mean (GM) of the peptide MICs against bacteria was calculated. When no detectable antimicrobial activity was observed at 128  $\mu$ M, a value of 256  $\mu$ M was used to calculate the geometric mean.

<sup>c</sup>Pathogenic strains here refer to bacteria other than *E. coli*.

<sup>d</sup>SI is calculated as MHC/GM (*E. coli*). Larger values indicate greater cell selectivity.

<sup>e</sup>The targeting index represents the specific ability to specially target antibacterial peptides. TI is calculated as GM(*E. coli*)/GM(Other Pathogenic strains) and GM(*E. coli*)/GM(Beneficial strains). Smaller values indicate greater specific ability.

**Table 4** MIC Values of the Engineered Peptides against *E. coli* ATCC25922 in the Presence of Physiological Salts, Serum, Acid and Alkaline.

| Peptide | Control <sup>a</sup> | Physiological Salts |                  |                                |                                |                                 |                                | Serum |     |       | Acid and Alkaline |      |       |       |
|---------|----------------------|---------------------|------------------|--------------------------------|--------------------------------|---------------------------------|--------------------------------|-------|-----|-------|-------------------|------|-------|-------|
|         |                      | NaCl <sup>b</sup>   | KCl <sup>b</sup> | MgCl <sub>2</sub> <sup>b</sup> | ZnCl <sub>2</sub> <sup>b</sup> | NH <sub>4</sub> Cl <sup>b</sup> | FeCl <sub>3</sub> <sup>b</sup> | 50%   | 25% | 12.5% | PH=2              | PH=4 | PH=10 | PH=12 |
| 1       | >64                  | >64                 | >64              | >64                            | >64                            | >64                             | >64                            | >64   | >64 | >64   | >64               | >64  | >64   | >64   |
| 2       | 16                   | >64                 | 16               | 32                             | 16                             | 16                              | 16                             | 16    | 16  | 16    | 32                | 16   | 16    | 32    |
| 3       | 4                    | 16                  | 4                | 8                              | 4                              | 4                               | 4                              | 4     | 4   | 4     | 4                 | 4    | 4     | 4     |
| 4       | 2                    | 2                   | 2                | 2                              | 2                              | 2                               | 2                              | 2     | 4   | 2     | 2                 | 2    | 2     | 2     |
| 5       | 8                    | >64                 | 8                | 32                             | 8                              | 8                               | 8                              | 8     | 8   | 8     | 32                | 32   | 16    | 16    |
| 6       | 8                    | >64                 | 8                | 32                             | 8                              | 8                               | 8                              | 8     | 8   | 8     | 32                | 16   | 16    | 16    |
| 7       | 32                   | >64                 | 32               | >64                            | 32                             | 32                              | 32                             | 32    | 32  | 32    | 32                | 32   | 32    | 32    |
| 8       | 16                   | >64                 | 16               | 32                             | 16                             | 16                              | 16                             | 16    | 16  | 16    | 64                | 32   | 16    | 64    |
| 9       | 16                   | >64                 | 32               | 64                             | 16                             | 16                              | 16                             | 32    | 16  | 16    | 32                | 32   | 16    | 16    |
| 10      | 8                    | 32                  | 8                | 64                             | 8                              | 8                               | 8                              | 8     | 8   | 8     | 8                 | 8    | 8     | 8     |
| 11      | 2                    | 32                  | 2                | 16                             | 2                              | 4                               | 4                              | 2     | 2   | 2     | 4                 | 4    | 2     | 4     |
| 12      | 8                    | >64                 | 8                | 32                             | 8                              | 8                               | 8                              | 4     | 4   | 4     | 16                | 8    | 16    | 16    |
| MLT     | 4                    | 16                  | 4                | 8                              | 4                              | 4                               | 4                              | 4     | 4   | 4     | 4                 | 4    | 4     | 4     |
| 14      | 64                   | >64                 | >64              | >64                            | >64                            | >64                             | >64                            | >64   | >64 | 64    | 64                | >64  | >64   | 64    |

<sup>a</sup>The control MIC values were determined in the absence of these physiological salts, serum, acid and alkaline.

<sup>b</sup>The final concentrations of NaCl, KCl, NH<sub>4</sub>Cl, MgCl<sub>2</sub>, ZnCl<sub>2</sub>, and FeCl<sub>3</sub> were 150 mM, 4.5 mM, 1 mM, 8μM, 6μM and 4μM.

## Design specially of targeted antimicrobial peptides

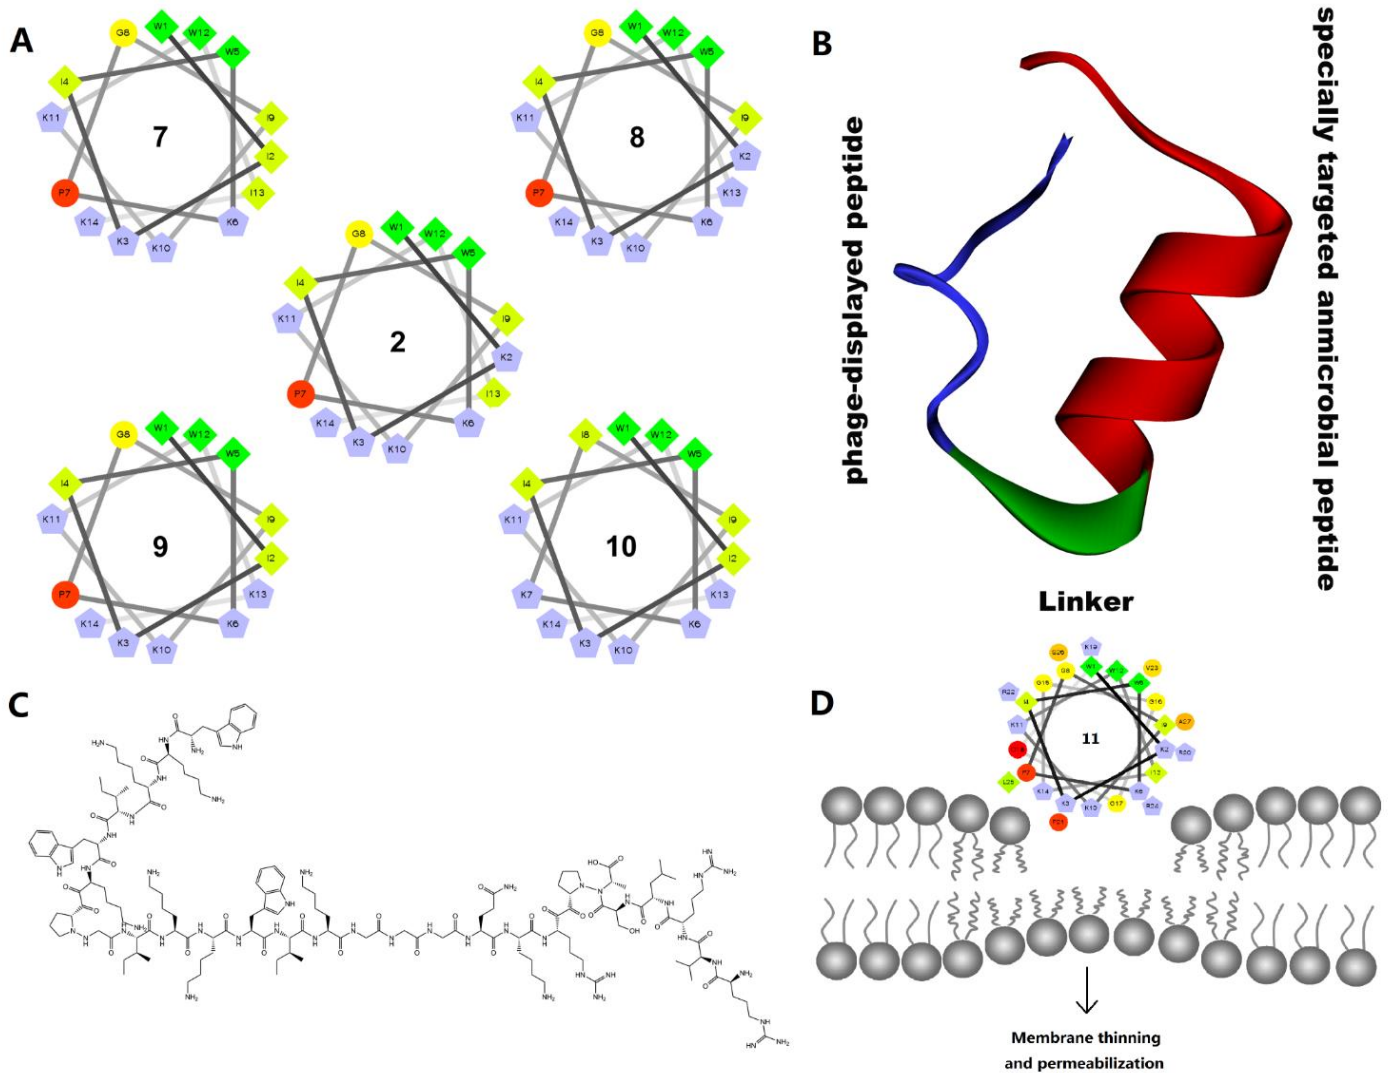

24  
25 **Figure 1.** Design of synthetic specially targeted antimicrobial peptides. (A) Helical wheel projections of the peptides. By default the  
26 output presents the hydrophilic residues as circles, hydrophobic residues as diamonds, potentially negatively charged as triangles, and  
27 potentially positively charged as pentagons. Hydrophobicity is color coded as well: the most hydrophobic residue is green, and the  
28 amount of green is decreasing proportionally to the hydrophobicity, with zero hydrophobicity coded as yellow. Hydrophilic residues  
29 are coded red with pure red being the most hydrophilic (uncharged) residue, and the amount of red decreasing proportionally to the  
30 hydrophilicity. The potentially charged residues are light blue. (B) Three-dimensional structure projections of the 11. The STAMP domain,  
31 linker and displaying peptide are color coded as red, green and blue. (C) Sequence and schematic structure of the 11. (D) Schematic  
32 model of the interaction of 11 with *E. coli* membrane.  
33



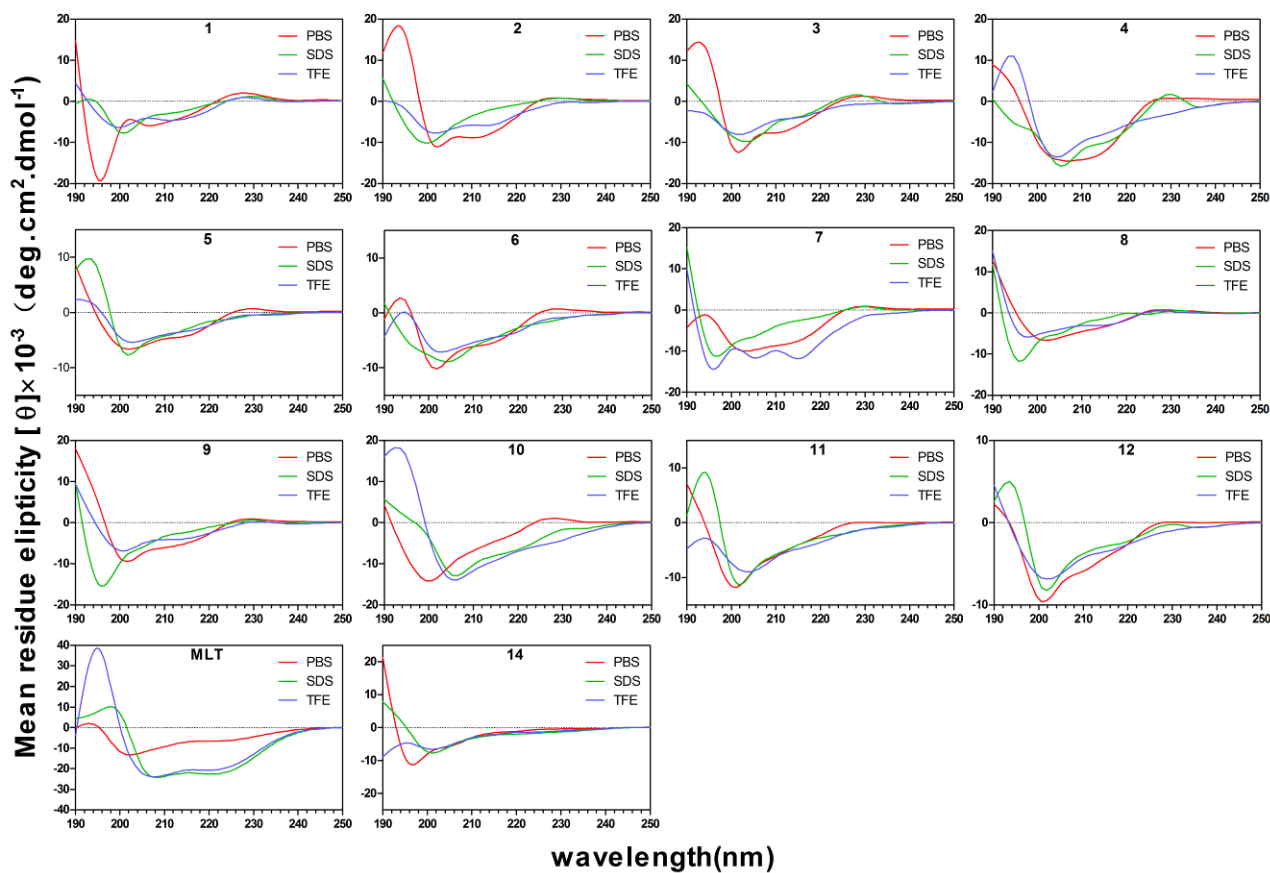

34

35

36

37

**Figure 2.** CD spectra of all peptides. All the peptides were dissolved in 10 mM PBS (PH 7.4), 50% TFE or 30 mM SDS. The mean residual ellipticity was plotted against wavelength. The values from three scans were average per sample, and peptide concentration were fixed at 150  $\mu$ M. The spectra were smoothed by GraphPad software.

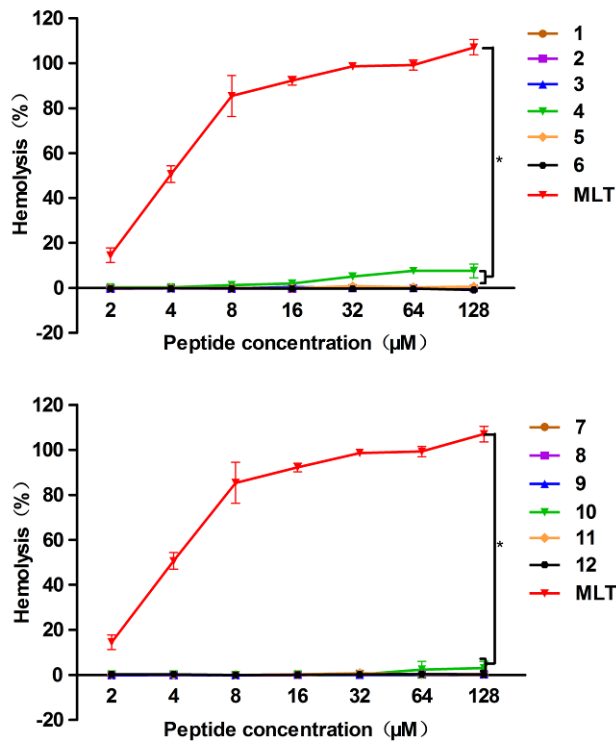

**Figure 3.** Hemolytic activity of the peptides against hRBCs. The graphs were derived from the average of three independent trials: (\*) P < 0.05, compared to values for Melittin.

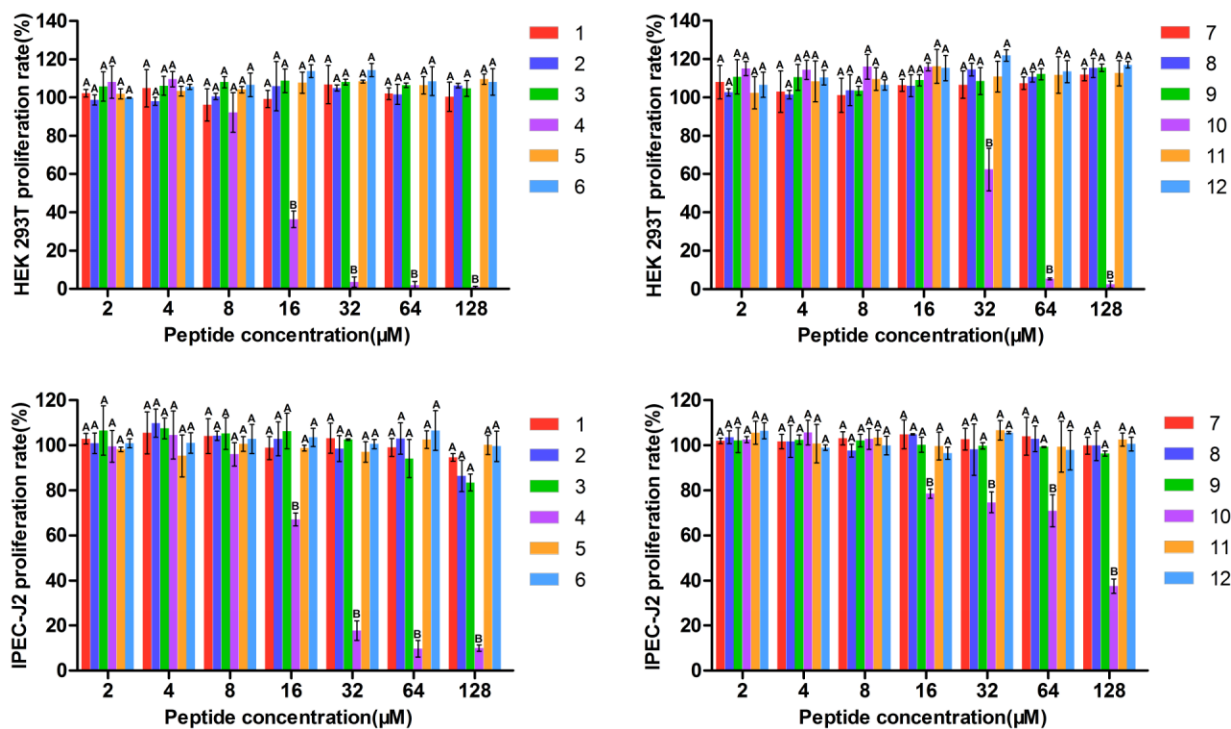

41  
42 **Figure 4.** Cytotoxicity of the peptides against HEK293T, IPEC-J2 cells. The graphs were derived from average of three independent  
43 trials. Mean values in the same concentration with different superscript indicate a significant difference ( $P < 0.05$ ).

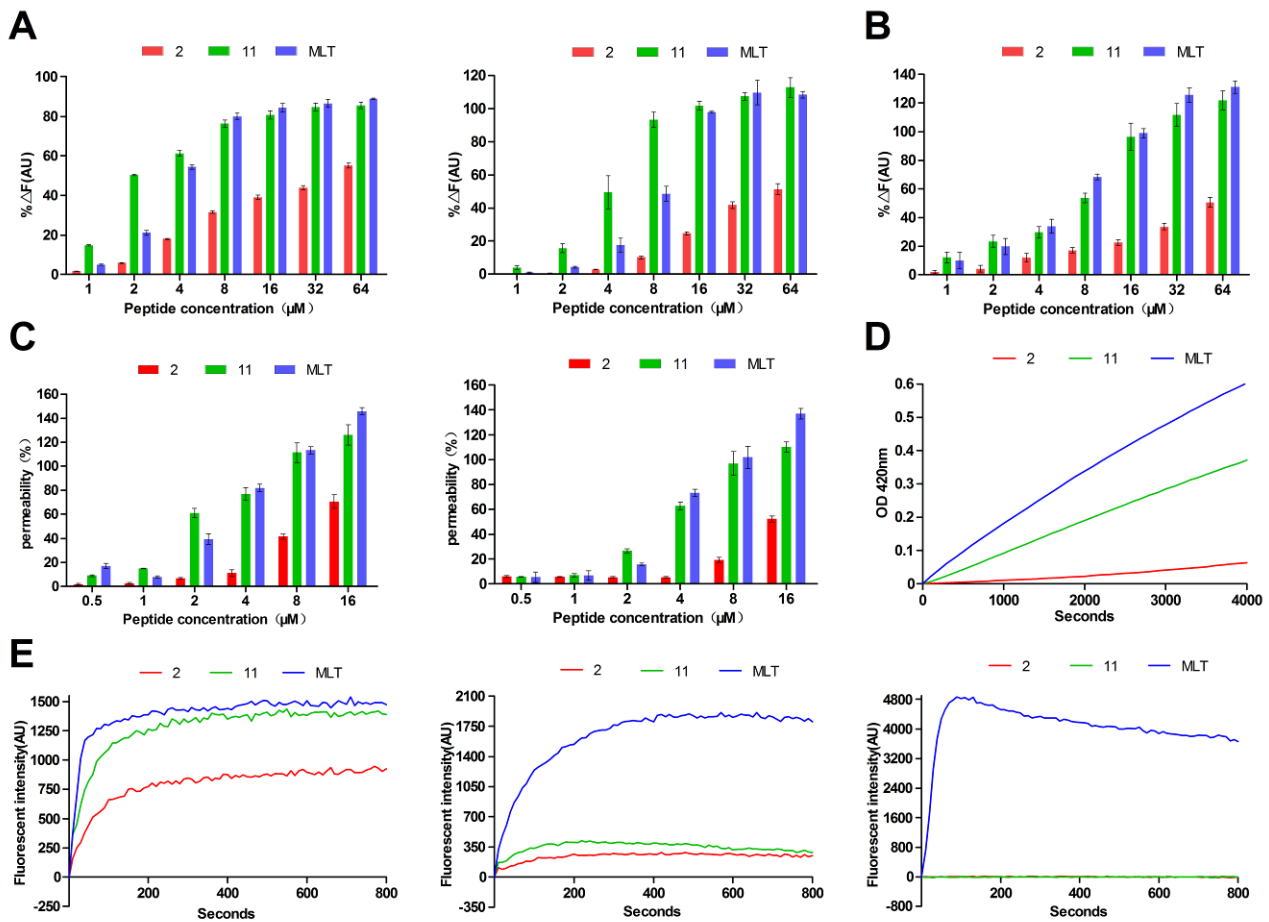

**Figure 5.** (A) Peptide binding affinity to LPS from *E. coli* 0111:B4 and *Pseudomonas aeruginosa* 10. (B) Peptide binding affinity to LTA from *S. aureus*. (C) Outer membrane permeability of the *E. coli* 25922 and *P. aeruginosa* 27853 treated by 2 μM peptides. (D) Inner membrane permeability of the *E. coli* 25922 treated by 2 μM peptides. (E) The cytoplasmic membrane potential variation of *E. coli* 25922, *P. aeruginosa* 27853 and *S. aureus* 29213 treated by 2 μM peptides.

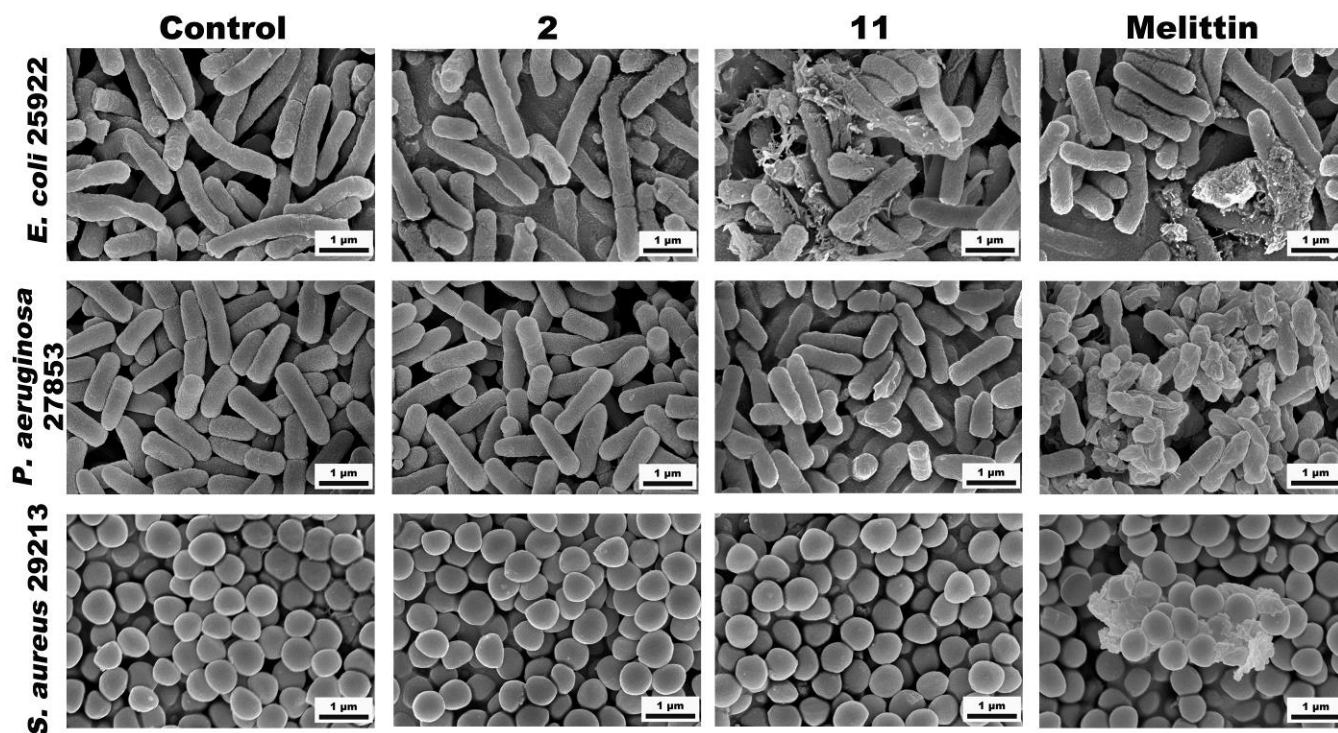

51  
52 **Figure 6** SEM images of *E. coli* 25922, *P. aeruginosa* 27853 and *S. aureus* 29213 treated for 1 h with the 2 μM peptides and 10 mM PBS  
53 (pH 7.4) (control).  
54

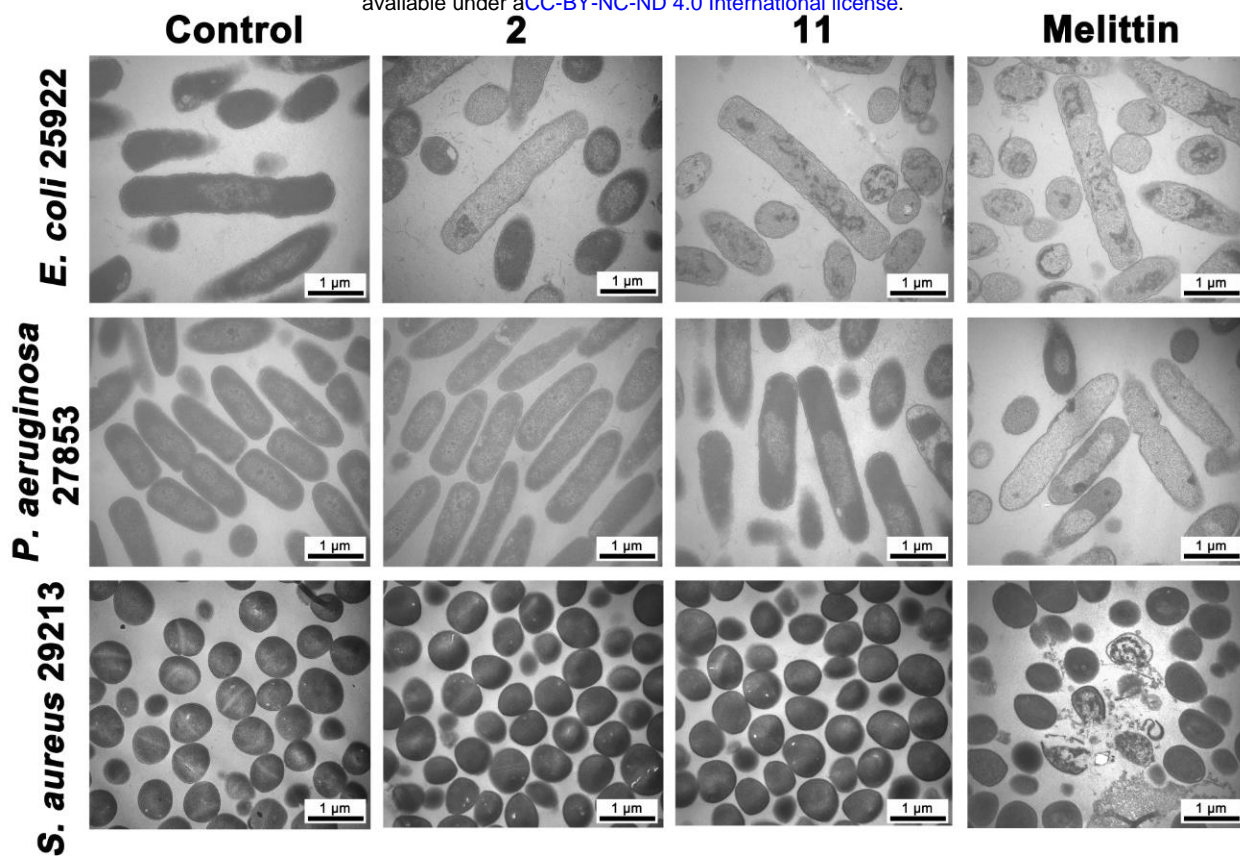

55  
56 **Figure 7** TEM images of *E. coli* 25922, *P. aeruginosa* 27853 and *S. aureus* 29213 treated for 1 h with the 2  $\mu$ M peptides and 10 mM PBS  
57 (pH 7.4) (control).

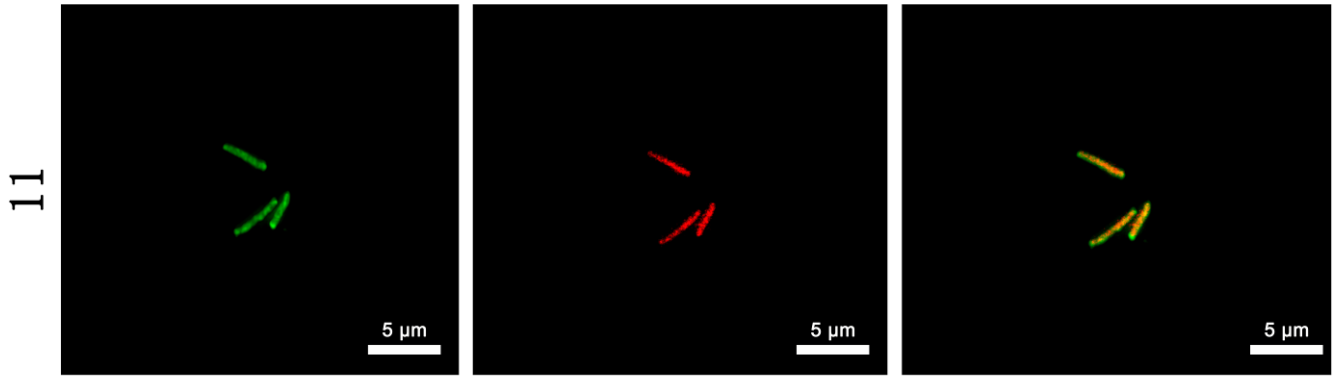

58  
59 **Figure 8** Deltavision OMX system analysis of *E. coli* 25922. Green signal from FITC-11 peptide, red signal from PI.  
60



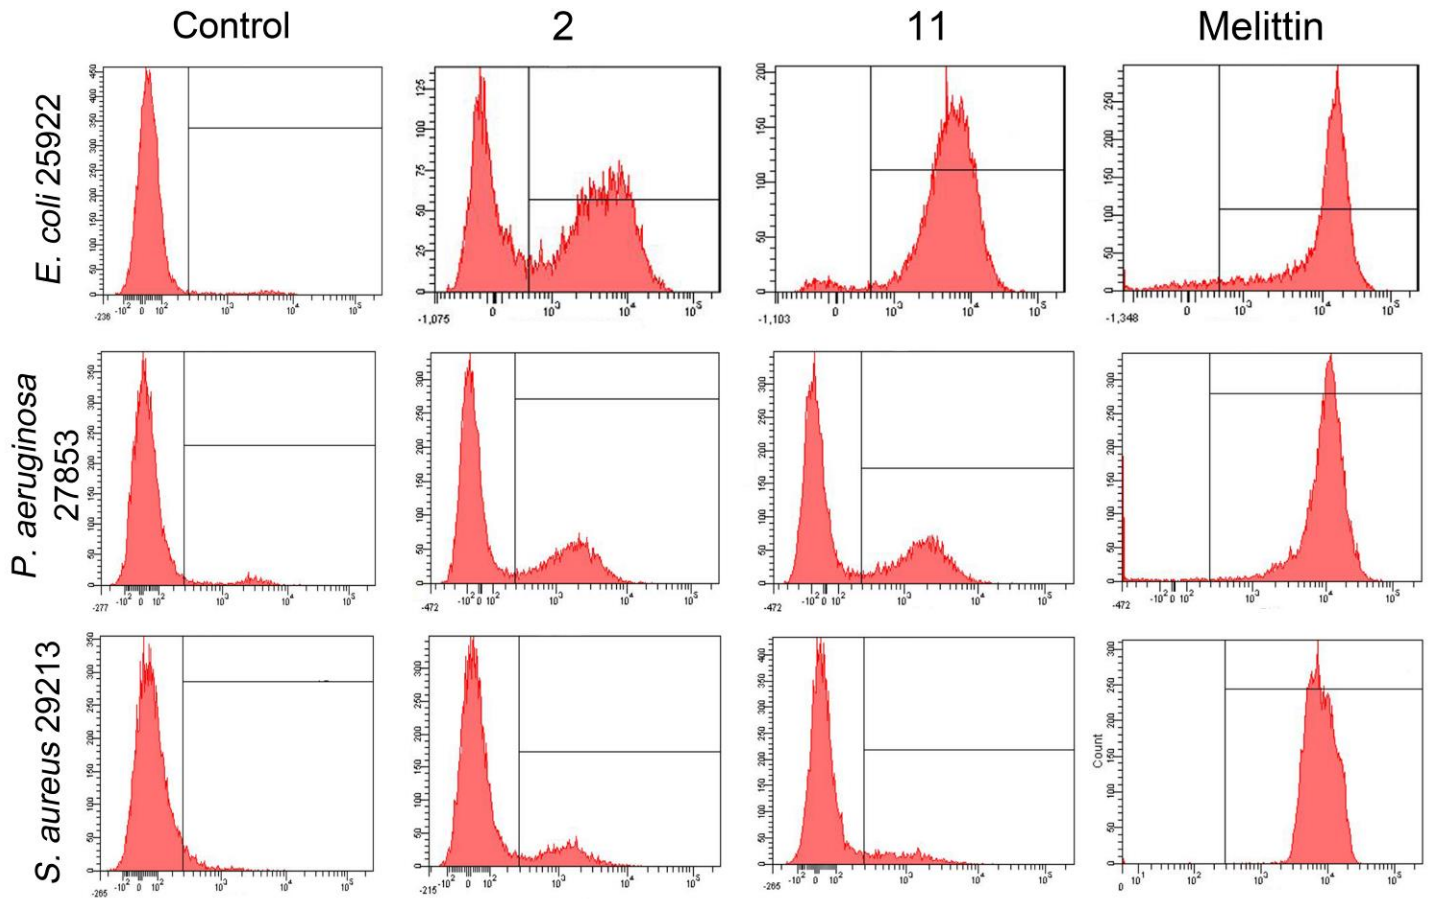

61  
62 **Figure 9** Flow cytometric analysis of *E. coli* 25922, *P. aeruginosa* 27853, and *S. aureus* 29213. The increments of cellular fluorescence  
63 intensity of PI (10µg/mL) after treating with the peptides was analyzed by flow cytometry.  
64



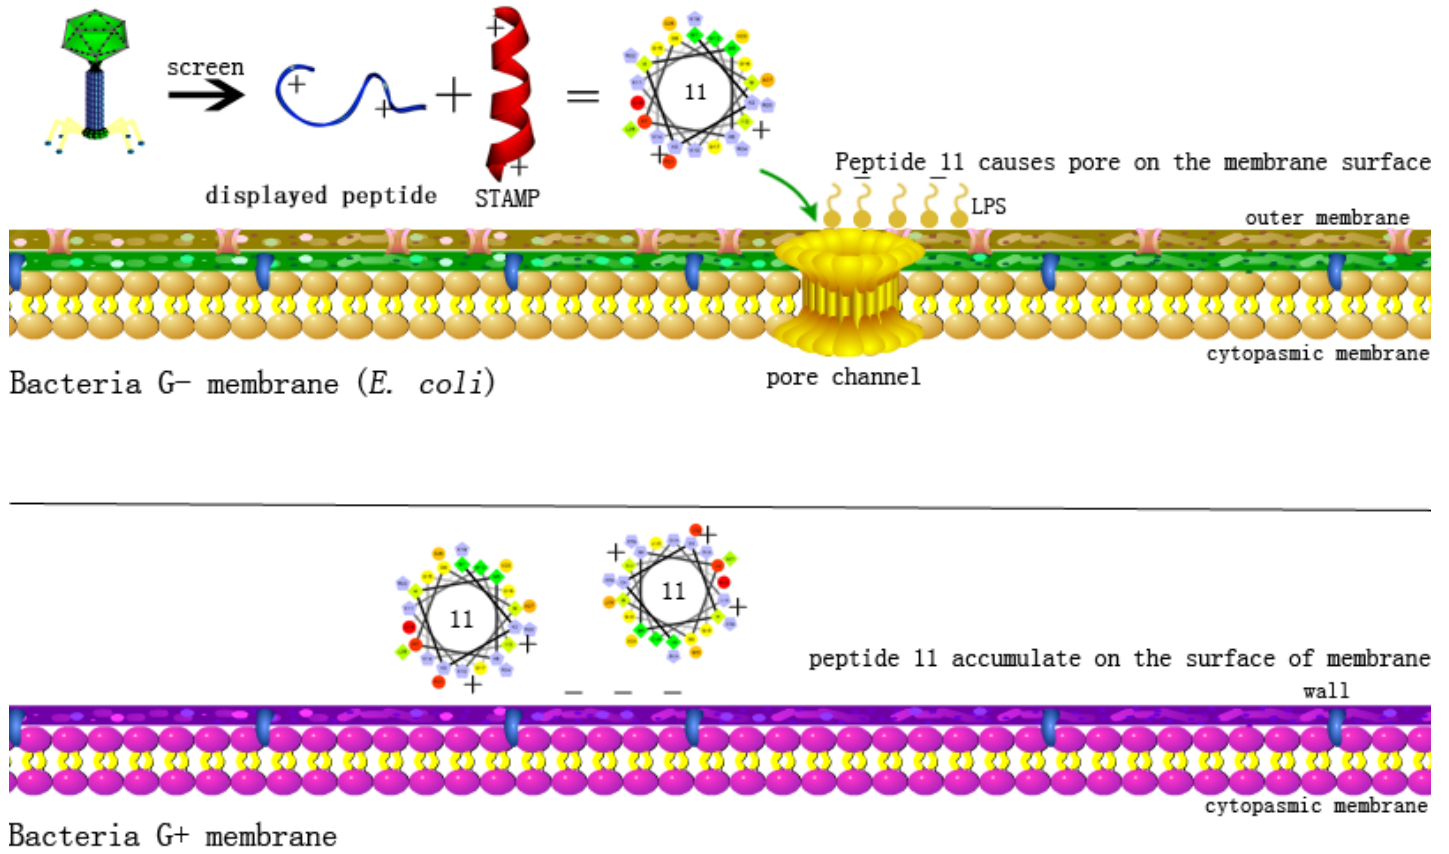

65  
66 **Figure 10** Schematic diagram of bactericidal mechanism of STAMP 11.  
67  
68  
69
